1 **A new species of *Nanhsiungchelys* (Testudines: Cryptodira: Nanhsiungchelyidae) from the Upper Cretaceous of**  
2 **Nanxiong Basin, China, and the role of anterolateral processes on the carapace in drag reduction**

3

4 Yuzheng Ke<sup>1</sup>, Imran A. Rahman<sup>2,3</sup>, Hanchen Song<sup>1</sup>, Jinfeng Hu<sup>1</sup>, Kecheng Niu<sup>4</sup>, Fenglu Han<sup>1\*</sup>

5

6 <sup>1</sup> School of Earth Science, China University of Geosciences (Wuhan), Wuhan 430074, China.

7 <sup>2</sup> The Natural History Museum, London SW7 5BD, UK.

8 <sup>3</sup> Oxford University Museum of Natural History, Oxford OX1 3PW, UK.

9 <sup>4</sup> Yingliang Stone Natural History Museum, Nan'an 362300, China

10 \* Correspondence: hanfl@cug.edu.cn

11

12 **Abstract:** Nanhsiungchelyidae are a group of large turtles that lived in Asia and North America during the Cretaceous. Here  
13 we report a new species of nanhsiungchelyid, *Nanhsiungchelys yangi* sp. nov., from the Upper Cretaceous of Nanxiong Basin,  
14 China. This is the second valid species of *Nanhsiungchelys*, and the holotype consists of a well-preserved skull and lower jaw,  
15 as well as the anterior parts of the carapace and plastron. The diagnostic features of *Nanhsiungchelys* include a huge estimated  
16 body size (~55.5 cm), a special network of sculptures on the surface of the skull and shell, weak cheek emargination and  
17 temporal emargination, deep nuchal emargination, and a pair of anterolateral processes on the carapace. However,  
18 *Nanhsiungchelys yangi* differs from the other species of *Nanhsiungchelys* in having a triangular-shaped snout and wide  
19 anterolateral processes. A phylogenetic analysis of nanhsiungchelyids places *Nanhsiungchelys yangi* and *Nanhsiungchelys*  
20 *wuchingensis* as sister taxa. Some nanhsiungchelyids bear special anterolateral processes on the carapace, which are unknown  
21 in extant turtles. Here we test the function of these processes in *Nanhsiungchelys yangi* using computational fluid dynamics,  
22 and the results suggest these processes could enhance locomotory performance by remarkably reducing drag force when the  
23 animal was swimming through water.

24 **Key Words:** *Nanhsiungchelys*, Upper Cretaceous, Nanxiong Basin, anterolateral processes, computational fluid dynamics.

25

26 **Introduction**

27 Nanhsiungchelyidae are an extinct group of Pan-Trionychia, which lived in Asia and North America from the Early  
28 Cretaceous until their extinction at the Cretaceous–Paleogene boundary (Hirayama et al., 2000; Li & Tong, 2017; Joyce et al.,  
29 2021). These turtles are characterized by a large body size (maximum 111 cm) (Tong & Li, 2019), flat carapace (Brinkman et  
30 al., 2015), stubby limbs (Yeh, 1966), and shells covered with a special network of sculptures consisting of pits and ridges (Li &  
31 Tong, 2017). In China, five species of nanhsiungchelyids have been reported (Table 1), with many specimens recovered from  
32 the Upper Cretaceous of Nanxiong Basin, Guangdong Province. Yeh (1966) described the first species, *Nanhsiungchelys*  
33 *wuchingensis*, which was restudied by Tong & Li (2019). Hirayama et al. (2009) provided a preliminary study of a large  
34 Cretaceous turtle (SNHM 1558) which they placed within Nanhsiungchelyidae; Li & Tong (2017) later attributed this to  
35 *Nanhsiungchelys*. In addition, two eggs (IVPP V 2789) from Nanxiong Basin were assigned to nanhsiungchelyids based on the  
36 co-occurrence with *Nanhsiungchelys wuchingensis* (Young, 1965).

37 Recently, the phylogenetic relationships of nanhsiungchelyids have been studied in detail (Danilov et al., 2013; Brinkman et  
38 al., 2015; Tong et al., 2016; Mallon & Brinkman, 2018; Tong & Li, 2019). Among the 13 species of Nanhsiungchelyidae,  
39 *Nanhsiungchelys* and *Anomalochelys* form a sister group, which share an elongated shell, huge nuchal emargination, large  
40 anterior process on the carapace, wide neurals and vertebral scutes, and sub-triangular first vertebral with very narrow anterior  
41 end (Tong & Li, 2019). The other nanhsiungchelyids (*Basilemys*, *Hanbogdemys*, *Jiangxichelys*, *Kharakhutulia*, *Yuchelys*, and  
42 *Zangerlia*) usually have a shorter carapace, shallow nuchal emargination, narrow neurals and vertebral scutes, and lack large  
43 anterior processes on the carapace (Tong & Li, 2019). *Nanhsiungchelys* and *Anomalochelys* have only been found in southern  
44 China and Japan (Hirayama et al., 2001; Hirayama et al., 2009; Li & Tong, 2017; Tong & Li, 2019), but the other species have  
45 a wider distribution (Central Asia, East Asia, and North America) (Danilov & Syromyatnikova, 2008; Mallon & Brinkman,  
46 2018).

47 The ecology of nanhsiungchelyids is debated (Mallon & Brinkman (2018) provided a detailed overview). Although many  
48 researchers support a terrestrial mode of life for the group (Yeh, 1966; Hutchison & Archibald, 1986; Scheyer, 2007; Dudgeon  
49 et al., 2021), Sukhanov & Narmandakh (1977) argued that the anatomy of *Hanbogdemys* was inconsistent with terrestrial  
50 habits based on characteristics of the forelimbs, humerus, and pelvis, and Nessov (1981) regarded these animals as specialized  
51 swimmers. Moreover, nanhsiungchelyids usually have a flatted carapace, which is a common feature of aquatic turtles (Xiao et  
52 al., 2017). Some nanhsiungchelyids (i.e. *Nanhsiungchelys* and *Anomalocheilus*) have distinctive anterolateral processes on the  
53 carapace (Hirayama et al., 2001; Hirayama et al., 2009; Tong & Li, 2019). The main function of these processes was  
54 previously thought to be protection (Hirayama et al., 2001), but their ecological significance has not received much attention  
55 from researchers to date. Although these anterolateral processes have not been found in any extant turtles, similar horn-like  
56 structures at the anterolateral margin of the carapace occurred in the Miocene turtle *Stupendemys geographicus*, which is  
57 thought to be an aquatic side-necked turtle (Cadena et al., 2020). Further support for an aquatic existence comes from  
58 *Anomalocheilus angulata*, which was recovered from marine sediments containing numerous radiolarian fossils (Hirayama et  
59 al., 2001), indicating that they lived in a coastal environment. Together, this strongly suggests that nanhsiungchelyids  
60 (especially *Nanhsiungchelys* and *Anomalocheilus*) were capable of swimming, but further analyses are necessary to test the  
61 function of the anterolateral processes in water.

62 Here, we report a new species of *Nanhsiungchelys* from Nanxiong Basin based on a complete skull and partial postcranial  
63 skeleton. This allows us to explore the taxonomy and morphology of nanhsiungchelyids, and based on this we carry out a  
64 phylogenetic analysis of the group. In addition, we use computer simulations of fluid flow (computational fluid dynamics) to  
65 obtain new insights into the function of the anterolateral processes.

66  
67

Table 1. Taxonomy and distribution of Nanhsiungchelyidae in China

| Taxa                                | Specimen Number | Location               | Age                | Stratigraphic Unit  | References                                 |
|-------------------------------------|-----------------|------------------------|--------------------|---------------------|--------------------------------------------|
| <i>Nanhsiungchelys wuchingensis</i> | IVPP V3106      | Nanxiong,<br>Guangdong | Late<br>Cretaceous | Yuanpu<br>Formation | Yeh (1966)<br>Tong & Li (2019)             |
| <i>Nanhsiungchelys</i> sp.          | SNHM 1558       | Nanxiong,<br>Guangdong | Late<br>Cretaceous | Nanxiong Group      | Hirayama et al. (2009)<br>Li & Tong (2017) |

|                                       |                                                                                                                                                                             |                                        |                    |                         |                                                                      |
|---------------------------------------|-----------------------------------------------------------------------------------------------------------------------------------------------------------------------------|----------------------------------------|--------------------|-------------------------|----------------------------------------------------------------------|
| <i>Nanhsiungchelys yangi</i> sp. nov. | CUGW VH108                                                                                                                                                                  | Nanxiong,<br>Guangdong                 | Late<br>Cretaceous | Yuanpu<br>Formation     | This paper                                                           |
| <i>Jiangxichelys neimongolensis</i>   | IVPP RV96007, IVPP<br>RV96008, IVPP<br>290690-6 RV 96009,<br>IVPP 020790-4 RV<br>96010, IVPP 130790<br>RV 96011, IMM 4252,<br>IMM 2802, IMM<br>96NMBY-I-14, IMM<br>93NMBY-2 | Bayan<br>Mandahu,<br>Inner<br>Mongolia | Late<br>Cretaceous | Wulansuhai<br>Formation | Brinkman & Peng (1996)<br>Brinkman et al. (2015)<br>Li & Tong (2017) |
| <i>Jiangxichelys ganzhouensis</i>     | NHMG 010415,<br>JXGZ(2012)-178,<br>JXGZ(2012)-179,<br>JXGZ(2012)-180,<br>JXGZ(2012)-182                                                                                     | Ganzhou,<br>Jiangxi                    | Late<br>Cretaceous | Nanxiong<br>Formation   | Tong & Mo (2010)<br>Tong et al. (2016)                               |
| <i>Yuchelys nanyangensis</i>          | HGM NR09-11-14,<br>CUGW EH051                                                                                                                                               | Nanyang,<br>Henan                      | Late<br>Cretaceous | Xiaguan<br>Formation    | Tong et al. (2012)<br>Ke et al. (2021)                               |

68

## 69 **Geological Setting**

70 Nanxiong Basin is a NE-trending faulted basin controlled by the Nanxiong Fault in the northern margin, covering an area of  
71 about 1800 km<sup>2</sup> and spanning Guangdong and Jiangxi provinces in China (Zhang et al., 2013). There are well-exposed  
72 outcrops of Cretaceous–Paleogene strata in Nanxiong Basin (Ling et al., 2005), which consist of nine formations: the  
73 Cretaceous Changba Formation, Jiangtou Formation, Yuanpu Formation, Dafeng Formation, Zhutian Formation, Zhenshui  
74 Formation, and Shanghu Formation (Pingling Member); and the Palaeocene Shanghu Formation (Xiahui Member), Nongshan  
75 Formation, and Guchengcun Formation (Zhang et al., 2013). Of these, the first six formations (Changba Formation to Zhenshui  
76 Formation) are referred to as the Nanxiong Group (Chang & Tung, 1963; Zhang et al., 2013). The Yuanpu Formation  
77 comprises a set of fine-grained sedimentary strata, which are interbedded with brownish red to purplish red thick-bedded  
78 siltstones and light brown to maroon medium thick-bedded sandstones of unequal thickness, and is locally intercalated with  
79 sandy conglomerate and a thin layer of gravel-bearing sandstone or lens (Zhang et al., 2013). Zhao et al. (1991) reported two  
80 K–Ar ages for the Yuanpu Formation (67.04±2.31 Ma and 67.37±1.49 Ma), which indicate that it was deposited in the late  
81 Maastrichtian stage. Many vertebrate fossils have been recovered from Yuanpu Formation, including: the turtle

82 *Nanhsiungchelys wuchingensis* (Yeh, 1966; Tong & Li, 2019); the turtle eggs *Oolithes nanhsiungensis* (Young, 1965); and the  
83 dinosaur eggs *Macroolithus rugustus*, *Nanhsiungoolithus chuetienensis*, *Ovaloolithus shitangensis*, *Ovaloolithus nanxiongensis*,  
84 and *Shixingoolithus erbeni* (Zhao et al., 2015).

85

## 86 **Material and Method**

### 87 **Fossil specimen**

88 The specimen (CUGW VH108) consists of a well-preserved skull and lower jaw, together with the anterior parts of the  
89 carapace and plastron (Figures 1–3). It is housed in the paleontological collections of China University of Geosciences  
90 (Wuhan). The skeleton was prepared by Yuzheng Ke and Kaifeng Wu, using an Engraving Pen AT-310, and was photographed  
91 with a Canon EOS 6D camera.

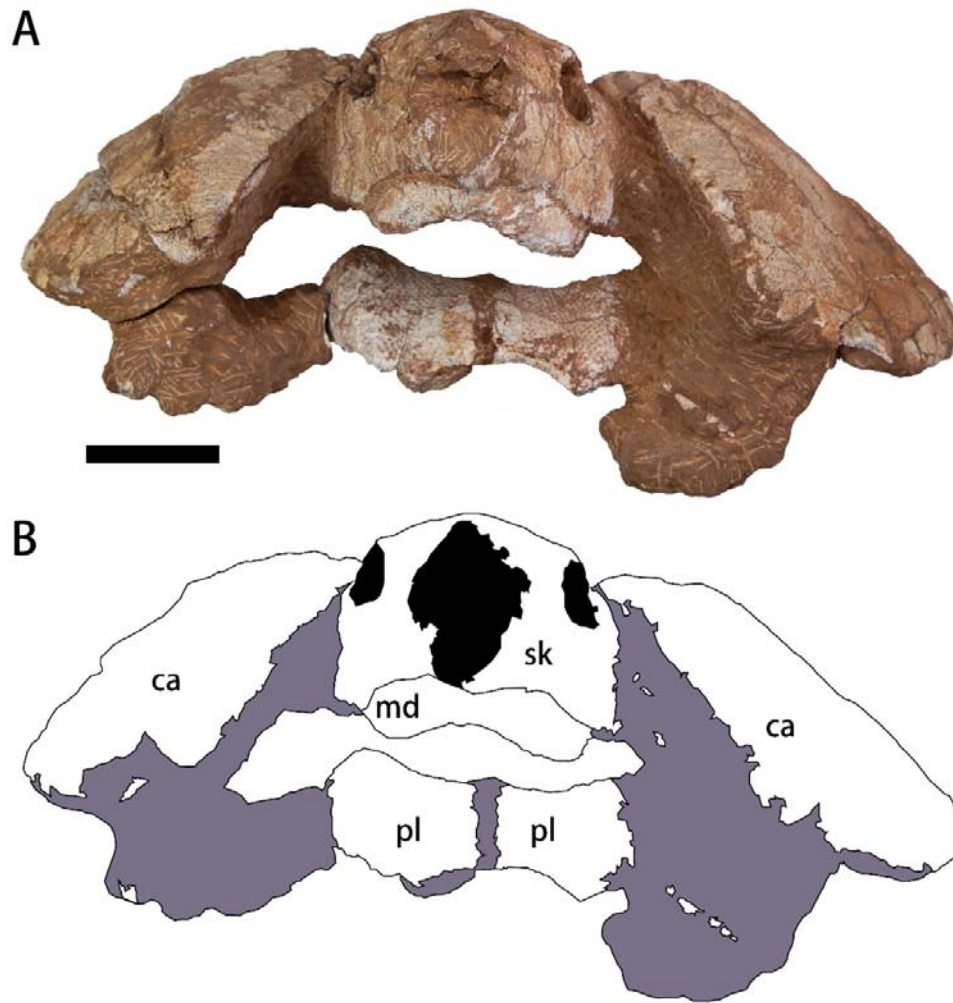

92

93 Figure 1. Photograph (A) and outline drawing (B) of *Nanhsiungchelys yangi* (CUGW VH108) in anterior view. Gray and black

94 parts indicate the surrounding rock and openings of the skull, respectively. Scale bar equals 5 cm. Abbreviations: ca, carapace;

95 md, mandible; pl, plastron; sk, skull.

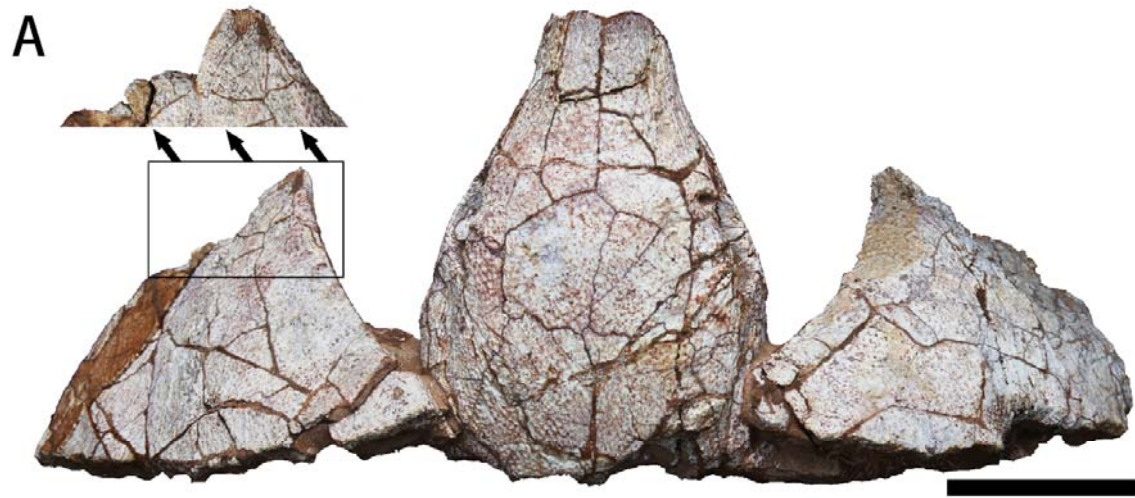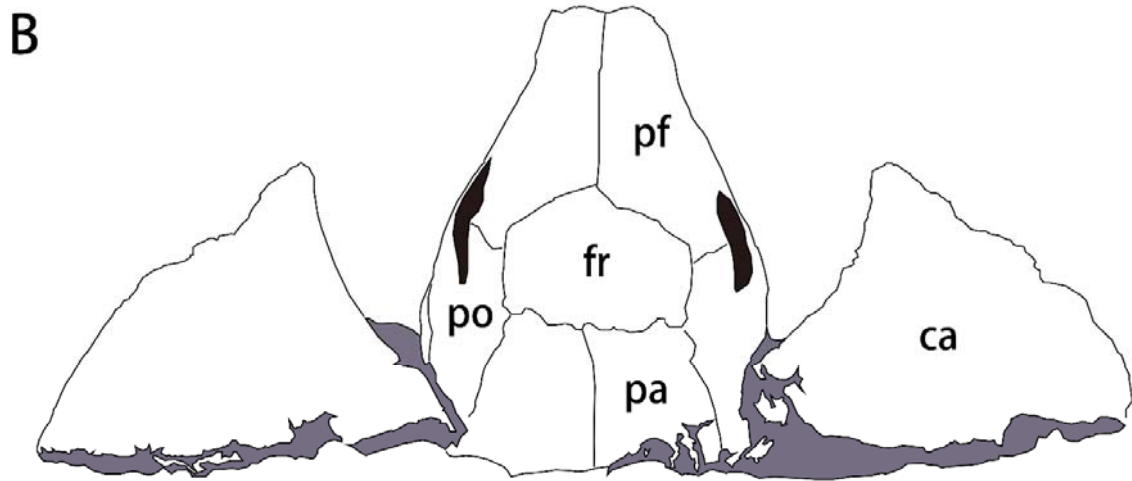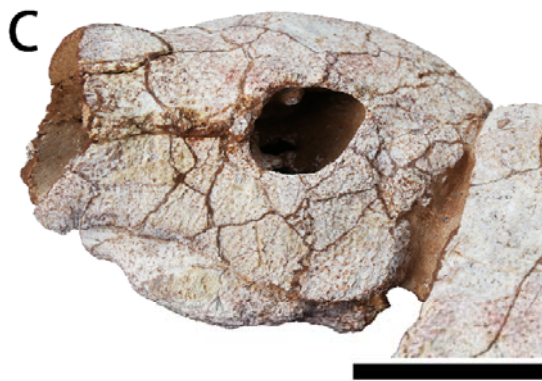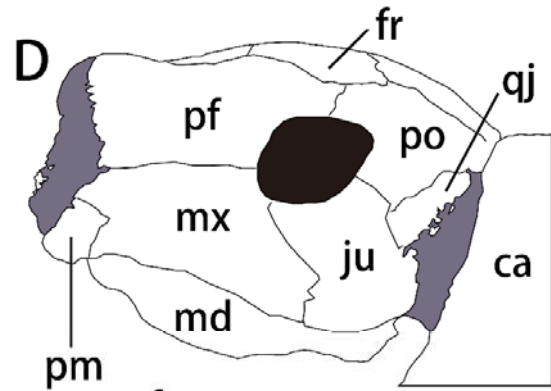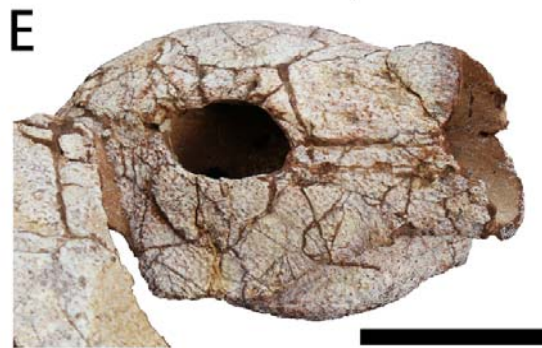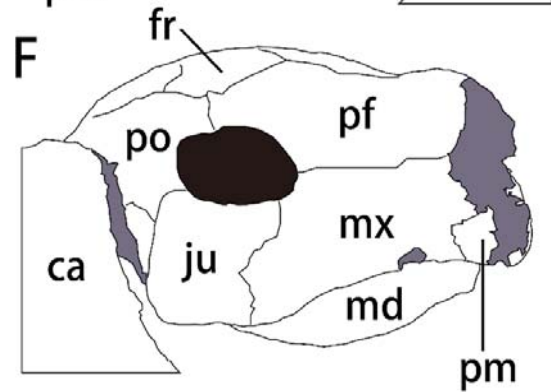

97

98 Figure 2. The skull and carapace of *Nanhsiungchelys yangi* (CUGW VH108). A, B. Photograph and outline drawing of the  
99 skull and carapace in dorsal view, and the small figure shows details in black box (perpendicular to surface of carapace). C, D.

100 Photograph and outline drawing of the skull in left lateral view. E, F. Photograph and outline drawing of the skull in right

101 lateral view. Gray and black parts indicate the surrounding rock and openings of the skull, respectively. Scale bars equal 5 cm.

102 Abbreviations: ca, carapace; fr, frontal; ju, jugal; md, mandible; mx, maxilla; pf, prefrontal; pa, parietal; pm, premaxilla; po,

103 postorbital; qj, quadratojugal.

104

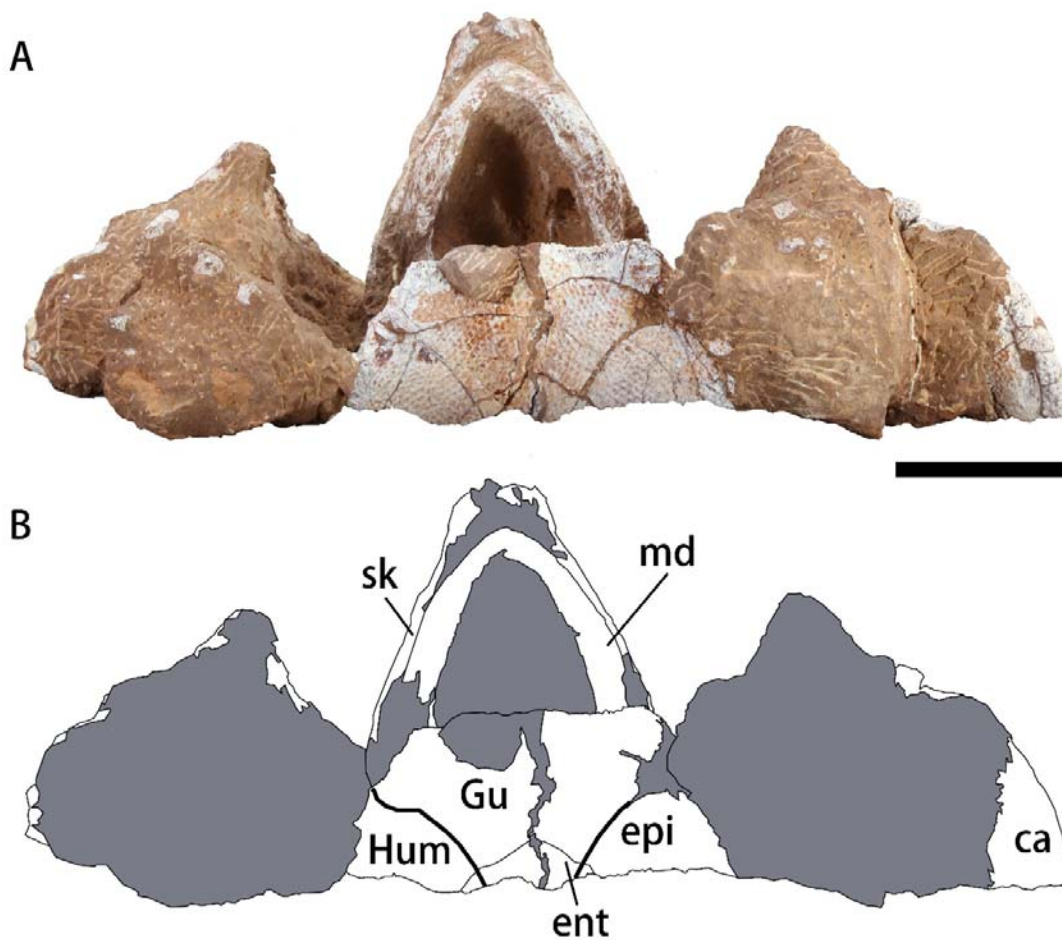

105

106 Figure 3. Photograph (A) and outline drawing (B) of *Nanhsiungchelys yangi* (CUGW VH108) in ventral view. Bold lines  
107 represent the sulci between scutes and gray parts indicate the surrounding rock. Scale bar equals 5 cm. Abbreviations: ca,

108 carapace; epi, epiplastron; ent, entoplastron; Gu, gular scute; Hum, humeral scute; md, mandible; sk, skull.



109

110 **Phylogenetic analysis**

111 Parsimony phylogenetic analysis was performed using the software TNT 1.5 (Goloboff & Catalano, 2016). The data matrix  
112 used herein was updated from Tong & Li (2019) and Mallon & Brinkman (2018), and includes 17 taxa and 50 characters.  
113 Because there are five inframarginal scutes on *Jiangxichelys ganzhouensis* (Tong et al., 2016), character 37 was modified to:  
114 “Inframarginals: (0) five to three pairs; (1) two pairs; (2) absent”. In addition, character 48 was changed in *Jiangxichelys*  
115 *ganzhouensis* from ? to 1 (i.e. ratio of midline epiplastral suture length to total midline plastral length greater than 0.1). A new  
116 character was also added: ratio of length to width of the carapace: (0) less than 1.6; (1) equal to or larger than 1.6. Moreover,  
117 *Yuchelys nanyangensis* was added to the data matrix based on Tong et al. (2012). A total of 13 characters out of 50 could be  
118 coded for *Nanhsiungchelys yangi*, representing only 26 % of the total number of characters. This is because the new species is  
119 based on a partial specimen missing many of the features scored in other taxa. The analysis was conducted using a traditional  
120 search with 1000 replicates. A tree bisection reconnection (TBR) swapping algorithm was employed, and 10 trees were saved  
121 per replicate. Most characters were treated as unordered, but characters 24, 29, and 47 were set to be additive because they  
122 show continuous character changes (i.e. 0→2). All characters are of equal weight. Standard bootstrap support values were  
123 calculated using a traditional search with 100 replicats. Bremer support values were also calculated (Bremer, 1994).

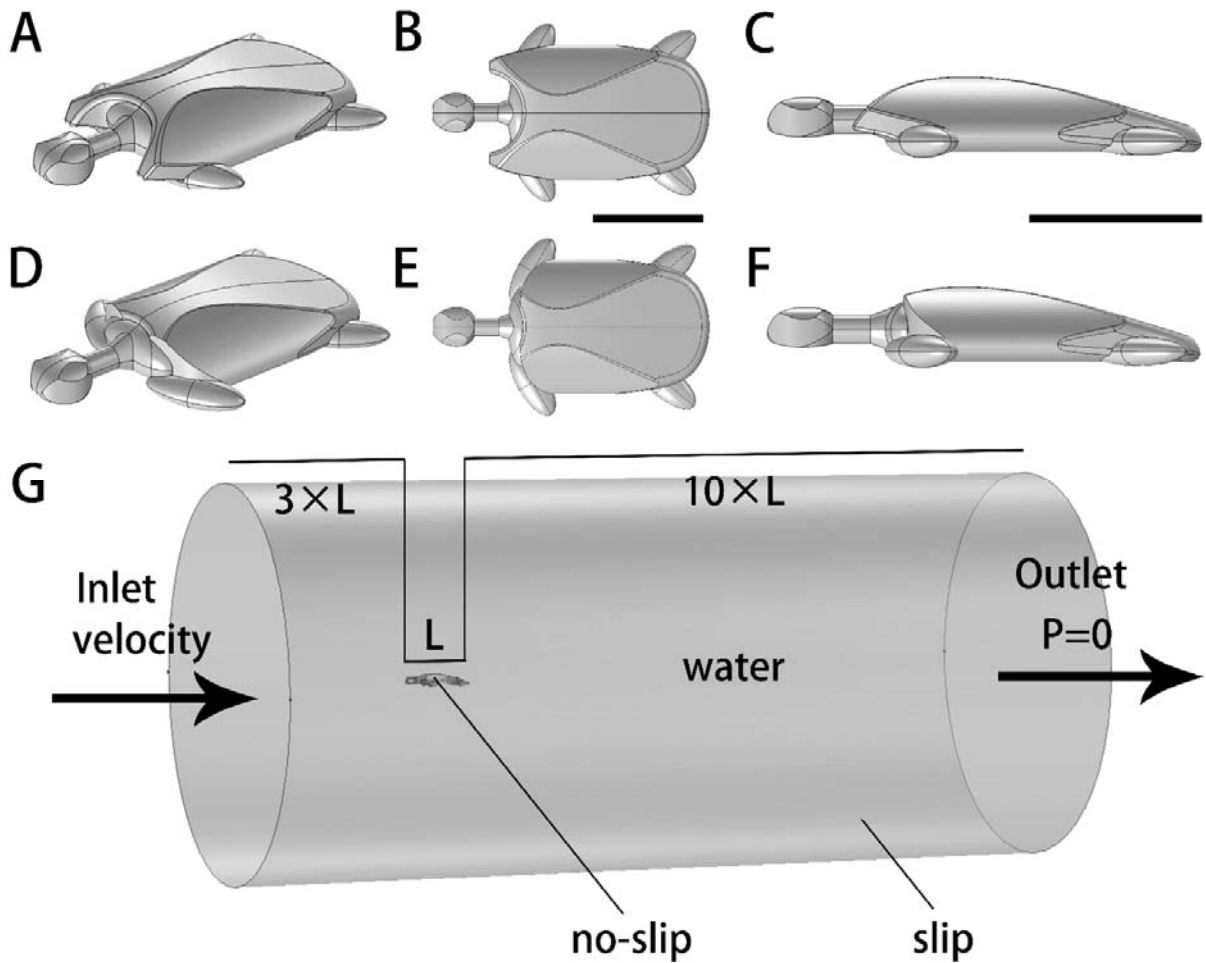

124

125 Figure 4. Three-dimensional digital models of *Nanhsiungchelys yangi* (A–C), a generalized turtle (D–F), and the  
126 computational domain used for computational fluid dynamics simulations (G). Scale bars equal 0.5 m.

127

## 128 Computational fluid dynamics

129 Computational fluid dynamics (CFD) is an useful tool for simulating flows of fluids and their interaction with solid surface  
130 (Rahman, 2017; Gibson et al., 2021). This basic principle involves transforming the Navier–Stokes equations corresponding to  
131 flow problems into algebraic equations and solving them using certain numerical methods at finite discrete moments and  
132 spatial nodes (grids) (Guo et al., 2019). Recently, CFD techniques have been used in paleontology to quantitatively assess the  
133 habits and ecology of a wide range of extinct organisms (Shiino et al., 2009; Shiino & Kuwazuru, 2010; Shiino et al., 2012;  
134 Kogan et al., 2015; Liu et al., 2015; Dynowski et al., 2016; Gutarra et al., 2019; Rahman et al., 2020; Gibson et al., 2021; Song

135 et al., 2021). In our research, CFD was used to evaluate the drag forces of turtles in water, and the simulations were performed  
136 in the software COMSOL Multiphysics (v. 5.6).

137 **Digital modelling.** Considering the close relationship between *Nanhsiungchelys yangi* and *Nanhsiungchelys wuchingensis*  
138 in our phylogeny (see below), we reconstructed a full 3-D model of *Nanhsiungchelys yangi* (Figure 4A–C) by referring to the  
139 holotype of *Nanhsiungchelys wuchingensis* (IVPP V3106). The 3-D reconstruction was created using the in-built geometry  
140 tools in COMSOL. The main structures of the turtle model were created with simple shapes (e.g. ellipsoids and cylinders). In  
141 addition, interpolation curves were drawn in Plane Geometry, which were then further extended into faces. Lastly, several  
142 fillets were added to create rounded corners on the 3-D geometries. This model was scaled to a carapace length of 1.0 m based  
143 on well-preserved specimens of *Nanhsiungchelys wuchingensis* (IVPP V3106) and *Nanhsiungchelys* sp. (SNHM 1558) which  
144 are 0.87 to 1.11 m in total carapace length (Hirayama et al., 2009; Tong & Li, 2019). Considering extant turtles swim with their  
145 heads and necks stretching from the shells, an idealized head and neck were added to the model to give the model a total length  
146 of 1.25 m. In addition, we constructed an idealized 3-D model of a turtle without the anterolateral processes on the carapace  
147 (here referred to as ‘generalized turtle’) for comparison, whose total length was also 1.25 m (Figure 4D–F).

148 For each model of length  $L$ , a cylindrical computational domain was created, whose upstream length was  $3\times L$ , downstream  
149 length was  $10\times L$ , and radius was  $5\times$  the maximum width of the model, following Gutarra et al. (2019) (Figure 4G). As these  
150 models are bilaterally symmetrical, only half of the turtle models and cylinders were used in simulations in order to reduce the  
151 computation time.

152 **Fluid properties and boundary conditions.** Parts of the domain inside the cylinder, surrounding the turtle model, were  
153 assigned the material properties of water using the built-in materials library in COMSOL. The upstream end of the cylinder  
154 was set as the inlet (turbulent intensity is 0.05, with the flow velocity specified here) and the downstream end of the cylinder  
155 was set as the outlet (pressure condition is static, pressure specified as 0 Pa, and suppress backflow is selected) (Figure 4G).  
156 The swimming speeds of extinct nanhsiungchelyids are unknown; however, the modal and maximum swimming speeds of the  
157 extant leatherback sea turtle *Dermochelys coriacea* (which has a curved carapace length from 1.45 to 1.69 m) are known to

158 range from 0.56–0.84 m/s and 1.9–2.8 m/s, respectively (Eckert, 2002). It is highly unlikely the swimming speeds of  
159 nanhsiungchelyids were faster than leatherback sea turtles due to the lack of paddle-like limbs, and we therefore simulated  
160 swimming speeds of 0.6 m/s, 1.0 m/s, 1.4 m/s, 1.8 m/s, 2.2 m/s, and 2.6 m/s in our study.

161 The flow regime was characterized using the dimensionless Reynolds numbers ( $Re$ ) (Reynolds, 1883; Gibson et al., 2021):

162 
$$Re = \frac{\rho UL}{\mu} \quad (1)$$

163 where  $\rho$  is the density of water (1000 kg/m<sup>3</sup>),  $U$  is the velocity of water flow (m/s),  $L$  is the model's maximum width (m), and  
164 the  $\mu$  is water's dynamic-viscosity coefficient. The  $Re$  of our simulations was  $\sim 4.75 \times 10^5$  to  $\sim 2.06 \times 10^6$ , which falls within the  
165 range of turbulent flow (i.e.  $Re > 1 \times 10^4$ ) (Gutarra et al. (2019), supplementary information). As a result, the  $k$ - $\epsilon$  turbulence  
166 model was used in all our simulations, which is robust, economizes on computational cost, and is known to be reasonably  
167 accurate for a wide range of turbulent flows (Adkins & Yan, 2006). Slip boundary condition was assigned to the side of the  
168 cylindrical computational domain, and no-slip boundary condition was assigned to the surface of the 3-D turtle models.

169 **Mesh size and computation.** The domains were meshed using free tetrahedral elements, with prismatic boundary layer  
170 elements inserted along the interface between the turtle model (Figure 5). A stationary solver was used to compute the steady  
171 state flow patterns, with the segregated iterations terminated when the relative tolerance reached  $1 \times 10^{-4}$ .

172 To evaluate the effect of mesh size on the CFD results, sensitivity tests were conducted with different meshes. Using an  
173 inlet velocity of 1.0 m/s, three different mesh sizes ('normal' to 'finer') were used for each of the models, and this showed that  
174 the drag forces and drag coefficients did not change significantly (Table 2, Figure 6). As a result, the finer mesh was selected  
175 and used in our analyses, which was composed of numerous smaller cells and thus could most accurately represent the flow  
176 (Gibson et al., 2021; Rahman, 2017).

177 Drag forces were computed for each model based on surface integration. Drag coefficients ( $C_D$ ) were then calculated using  
178 the following equation (Rahman, 2017; Gibson et al., 2021):

179 
$$C_D = \frac{2F_D}{\rho U^2 A} \quad (2)$$

180 where  $F_D$  is the drag force (N),  $\rho$  is the density of water (1000 kg/m<sup>3</sup>),  $U$  is the velocity of water flow (m/s), and  $A$  is the

181 characteristic area ( $m^2$ ). Moreover, 2-D plots showing flow velocity magnitude (Figure 10) and streamlines around the turtle  
182 models (Figure 11) were visualized.  
183

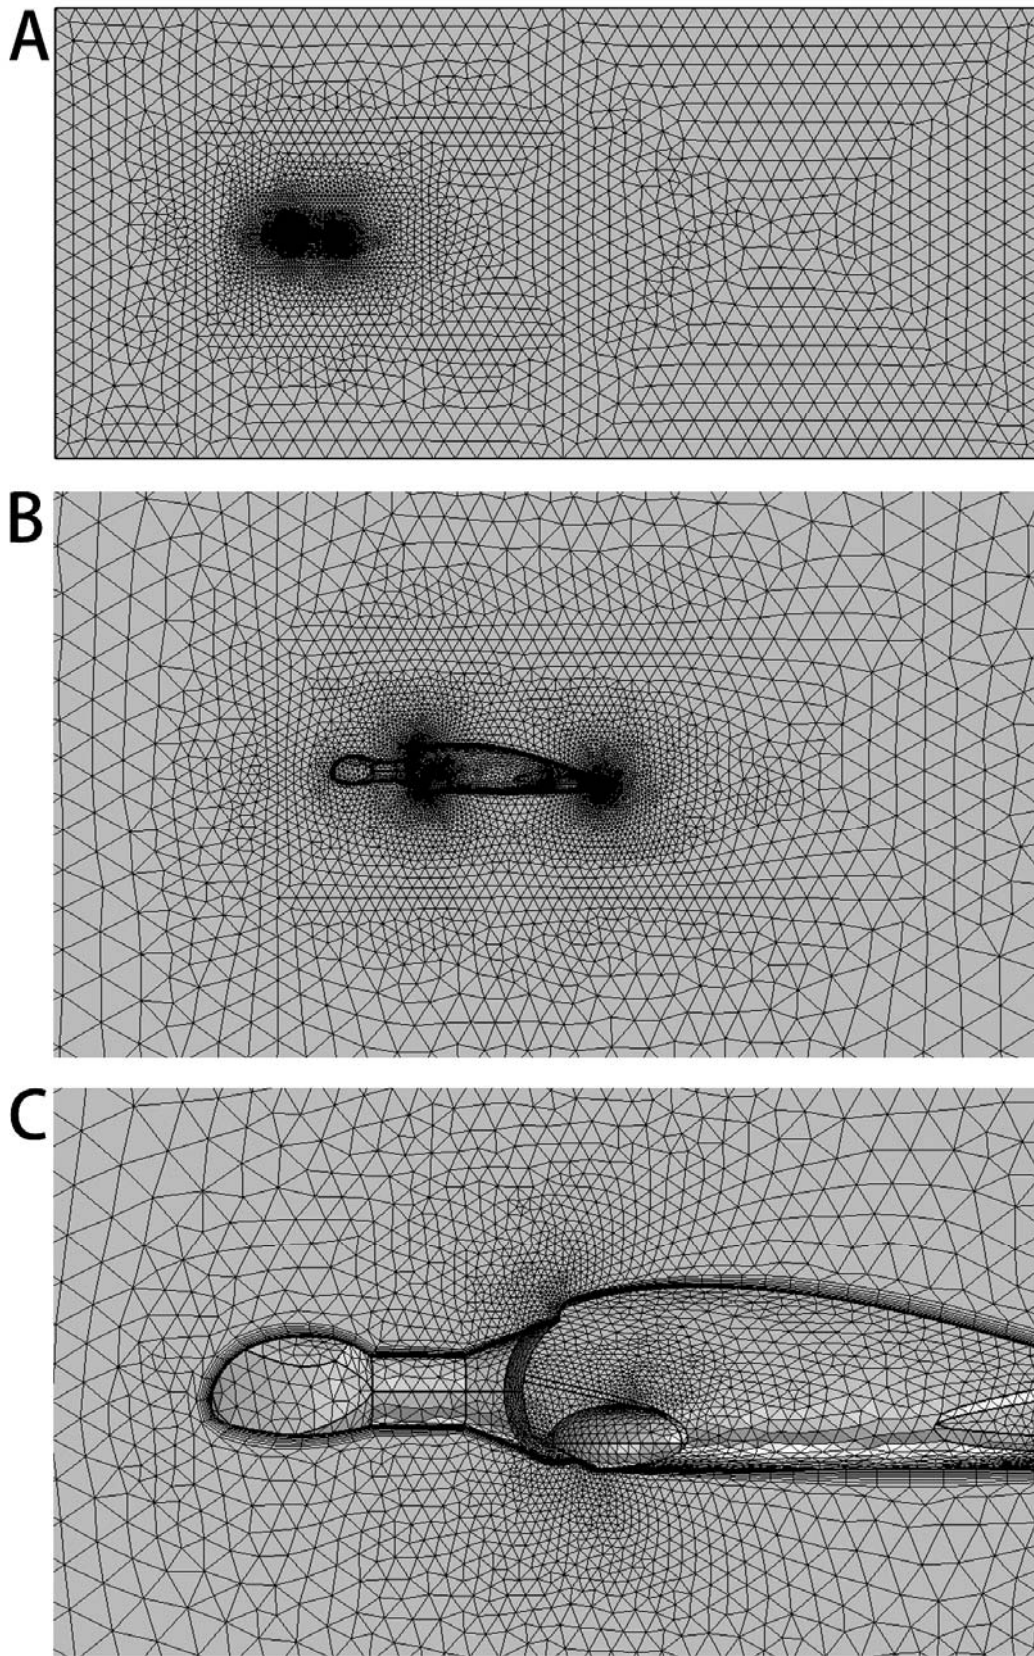

184

185 Figure 5. Mesh used in CFD simulations. A, mesh used in the whole computational domain. B, details of the mesh near the

186 turtle model. C, details of the mesh near the anterior of the turtle model.

187 Table 2. Drag forces and drag coefficients obtained for different mesh sizes for three-dimensional digital models of

188 *Nanhsiungchelys yangi* and a generalized turtle.

| Mesh size | <i>Nanhsiungchelys yangi</i> |            |                  | Generalized turtle |            |                  |
|-----------|------------------------------|------------|------------------|--------------------|------------|------------------|
|           | Number of elements           | Drag force | Drag coefficient | Number of elements | Drag force | Drag coefficient |
| Normal    | 380495                       | 22.312 N   | 0.372            | 316015             | 28.058 N   | 0.468            |
| Fine      | 644382                       | 20.892 N   | 0.348            | 495692             | 27.088 N   | 0.451            |
| Finer     | 1431064                      | 19.176 N   | 0.320            | 1006082            | 25.826 N   | 0.430            |

189

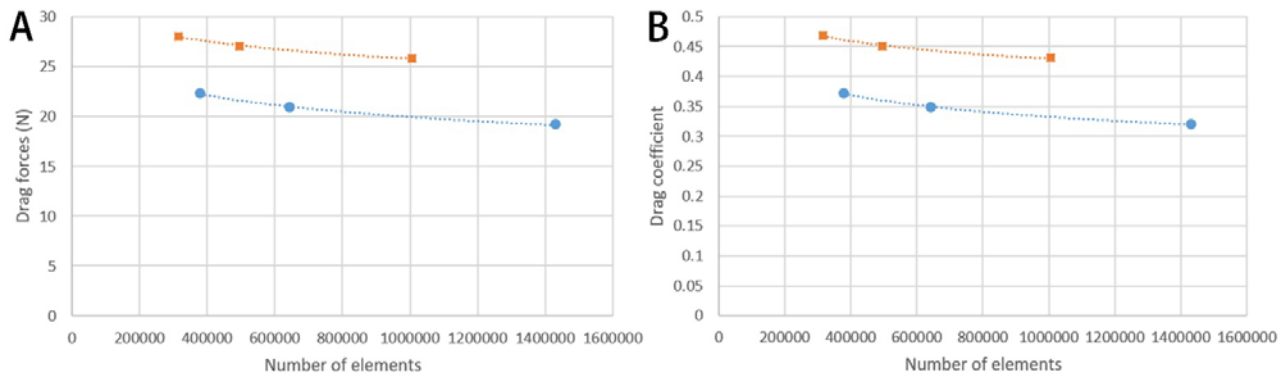

190

191 Figure 6. Comparison of drag forces (A) and drag coefficients (B) for three-dimensional digital models of *Nanhsiungchelys*

192 *yangi* and generalized turtle at different mesh sizes. Blue circles represent results for the *Nanhsiungchelys yangi* model and

193 orange squares represent results for the generalized turtle model.

194

195 **Institutional abbreviations:** CUGW, China University of Geosciences (Wuhan); HGM, Henan Geological Museum; IMM,

196 Inner Mongolia Museum; IVPP, Institute of Vertebrate Paleontology and Paleoanthropology, Chinese Academy of Sciences;

197 LJU, Lanzhou Jiaotong University; NHMG, Natural History Museum of Guangxi; NMBY, Nei Mongo Bowuguan; SNHM,

198 Shanghai Natural History Museum; UB, University of Bristol; UPC, China University of Petroleum (East China); YSNHM,

199 Yingliang Stone Natural History Museum.

200

201 **Results**

202 **Systematic paleontology**

203 Order Testudines Linnaeus, 1758

204 Infraorder Cryptodira Cope, 1868

205 Superfamily Trionychoidea Fitzinger, 1826

206 Family Nanhsiungchelyidae Yeh, 1966

207 Genus *Nanhsiungchelys* Yeh, 1966

208 **Emended diagnosis:** A genus of Nanhsiungchelyidae of medium-large size, with a carapace length of 0.5–1.1 m. The surface  
209 of the skull, lower jaw and both carapace and plastron are covered with sculptures consisting of large pits formed by a network  
210 of ridges. Temporal emargination and cheek emargination are weak; orbits located at about mid-length of the skull and facing  
211 laterally; jugal forms the lower margin of the orbit. Carapace elongate, with a deep nuchal emargination and a pair of large  
212 anterolateral processes that extend forward and are formed entirely by the first peripheral; wide neural plates and vertebral  
213 scutes; gulars fused and extend deeply onto the entoplastron; intergulars absent; complete row of narrow inframarginals. Wide  
214 angle between the acromion process and scapula process of about 105°. One large dermal plate located above the manus.

215 **Type species.** *Nanhsiungchelys wuchingensis* Yeh, 1966

216 **Distribution.** Guangdong, China

217

218 Species *Nanhsiungchelys yangi* sp. nov.

219 **Etymology.** *Yangi* is in memory of paleontologist Zhongjian Yang (Chung-Chien Young).

220 **Holotype.** CUGW VH108, a partial skeleton comprising a well-preserved skull and lower jaw and the anterior parts of the  
221 carapace and plastron (Figures 1–3).

222 **Locality and horizon.** Nanxiong, Guangdong, China. Yuanpu Formation, Upper Cretaceous.

223 **Diagnosis.** A medium-sized species of *Nanhsiungchelys* with an estimated carapace length of more than 0.5 meters. It differs  
224 from other species of *Nanhsiungchelys* in the following combination of characters: the snout is triangular in dorsal view; the  
225 premaxilla is higher than wider; the posteroventral ramus of the maxilla extends to the ventral region of the orbit; the dorsal



226 margin of the maxilla is relatively straight; the jugal is higher than wider; the prefrontal is convex dorsally behind the naris; no  
227 suture present between the paired frontals; the temporal emargination is mainly formed by the parietal; the paired parietals are  
228 bigger than the fused frontal in dorsal view; the middle and posterior parts of the mandible are more robust than the most  
229 anterior part in ventral view; the anterolateral processes is wide; and the angle between the two anterior edges of the  
230 entoplastron is wide (~110°).

231

## 232 **Description.**

### 233 **General aspects of the skull**

234 The skull is large, with a length of 13 cm (Figure 2A, B). It is well preserved but there are many cracks on its outer surface,  
235 which limit the identification of bone sutures. The snout (i.e. the parts anterior to the orbit) is large, equal to about 1/3 length of  
236 the skull, and longer than in *Jiangxichelys neimongolensis* and *Zangerlia ukhaachelys* (Joyce & Norell, 2005; Brinkman et al.,  
237 2015). In dorsal view, the snout is triangular and differs from *Nanhsiungchelys wuchingensis* in which the snout is  
238 trumpet-shaped (Tong & Li, 2019). A large naris is located in the front part of the snout, which is roughly lozenge shaped and  
239 higher than wider in anterior view (Figure 1). Since the skull is partially withdrawn into the shell, it is difficult to accurately  
240 determine the morphological characteristics of cheek emargination (Figure 2C–F). However, we infer that the cheek  
241 emargination is not deep, because otherwise this would extend beyond the dorsal margin of the orbit, as in some extant turtles  
242 (e.g. *Emydura macquarrii*) (Li & Tong, 2017). Posteriorly, the temporal emargination is weakly developed (Figure 2A, B),  
243 which is similar to *Nanhsiungchelys wuchingensis* (Tong & Li, 2019), but differs from *Jiangxichelys neimongolensis*,  
244 *Jiangxichelys ganzhouensis* and *Zangerlia ukhaachelys* (Brinkman & Peng, 1996; Joyce & Norell, 2005; Tong et al., 2016).  
245 The surface of the skull (and the carapace and plastron) is covered with a special network of sculptures consisting of pits and  
246 ridges, which is a synapomorphy of Nanhsiungchelyidae (Li & Tong, 2017).

### 247 **Premaxilla**

248 A small bone in the anterior and ventral part of the maxilla is identified as the premaxilla (Figure 2C–F). It is higher than

249 wider, similar to *Jiangxichelys neimongolensis* and *Zangerlia ukhaachelys* (Joyce & Norell, 2005; Brinkman et al., 2015), but  
250 differs from *Nanhsiungchelys wuchingensis* in which the premaxilla is wider than higher in lateral view and has an inverse  
251 Y-shape in ventral view (Tong & Li, 2019). Due to poor preservation of the most anterior parts of the premaxilla, it is difficult  
252 to determine whether the left and right premaxillae contact each other.

### 253 **Maxilla**

254 The maxilla is large and trapezoid in outline (Figure 2C–F). The main shaft is located anterior to the orbit, but the  
255 posteroventral ramus extends to the ventral region of the orbit, which differs from the situation in *Nanhsiungchelys*  
256 *wuchingensis* in which the maxilla is located entirely anterior to the orbit (Tong & Li, 2019), and also differs from most other  
257 turtles (including *Zangerlia ukhaachelys* and *Jiangxichelys neimongolensis*) in which the maxilla consists of the lower rim of  
258 the orbit (Joyce & Norell, 2005; Brinkman et al., 2015). In lateral view, the dorsal margin of the maxilla is relatively straight  
259 and extends posteriorly to the mid-region of the eye socket, which is similar to some extant turtles (e.g. *Platysternon*  
260 *megacephalum*) (Li & Tong, 2017). However, this differs from *Nanhsiungchelys wuchingensis* in which the top of the maxilla  
261 is curved dorsally (Tong & Li, 2019), and also differs from *Zangerlia ukhaachelys* and *Jiangxichelys neimongolensis* in which  
262 the top of the maxilla tapers anterodorsally (Joyce & Norell, 2005; Brinkman et al., 2015).

### 263 **Jugal**

264 The jugal is shaped like a parallelogram in lateral view (Figure 2C–F). It is higher than wider, unlike *Nanhsiungchelys*  
265 *wuchingensis* in which the jugal is wider than higher (Tong & Li, 2019). The jugal consists of the lower rim of the orbit, which  
266 is similar to *Nanhsiungchelys wuchingensis*, but differs from most turtles in which this structure is mainly formed by the  
267 maxilla (Tong & Li, 2019). The jugal of *Nanhsiungchelys yangi* also differs from *Jiangxichelys ganzhouensis* in which the  
268 jugal is more posteriorly located (Tong et al., 2016). The jugal contacts with the maxilla in front, and this boundary is sloped.  
269 The terminal parts of the jugal contacts with the quadratojugal.

### 270 **Quadratojugal**

271 The bone that behind the jugal and below the postorbital is identified as the quadratojugal (Figure 2C–F). Its location is

272 similar to *Nanhsiungchelys wuchingensis* (Tong & Li, 2019), but the full shape is uncertain due to the cover with carapace.

### 273 **Prefrontal**

274 In dorsal view, each prefrontal is large and elongate anteroposteriorly, and narrows anteriorly and enlarges posteriorly  
275 (Figure 2A, B). The portion in front of the orbit is entirely composed of the prefrontal (Figure 2A, B), which differs from  
276 *Nanhsiungchelys wuchingensis* in which the maxilla extends forward to the prefrontal and occupies some space (Tong & Li,  
277 2019). The paired prefrontals contact each other at the midline and form an approximate arrow shape. They form the dorsal  
278 margin of naris anteriorly, the anterodorsal rim of the orbit posterolaterally, and contact the frontal and postorbital posteriorly  
279 (Figure 2A, B). The contact area between the prefrontal and frontal is convex forward, which is similar to *Nanhsiungchelys*  
280 *wuchingensis* (Tong & Li, 2019). In lateral view, the prefrontal is anterior to the postorbital and above the maxilla, and consists  
281 of the anterodorsal rims of the orbit (Figure 2C–F). This is similar to *Nanhsiungchelys wuchingensis*, *Jiangxichelys*  
282 *neimongolensis* and *Zangerlia ukhaachelys* (Brinkman & Peng, 1996; Joyce & Norell, 2005; Tong & Li, 2019). Behind the  
283 naris, the prefrontal is convex dorsally (Figure 2C–F), rather than concave downward showing as in *Nanhsiungchelys*  
284 *wuchingensis* (Tong & Li, 2019).

### 285 **Frontal**

286 The frontal is a large pentagonal bone that is located in the center of the skull roof (Figure 2A, B), which is similar to  
287 *Nanhsiungchelys wuchingensis* and *Zangerlia ukhaachelys* (Joyce & Norell, 2005; Tong & Li, 2019). Its anterior margin has a  
288 “A” shape for articulating with the prefrontal. The lateral and posterior margins contact the postorbital and parietal respectively.  
289 It is excluded from the rim of the orbit, as in *Nanhsiungchelys wuchingensis* and *Zangerlia ukhaachelys* (Joyce & Norell, 2005;  
290 Tong & Li, 2019). There is no suture between the paired frontals, suggesting they are fused at the midline. This is an  
291 autapomorphy rather than ontogenetic variation, because the sutures occurred on the mature individual of *Nanhsiungchelys*  
292 *wuchingensis* (IVPP V3106) whose carapace length is 111 cm (Tong & Li, 2019).

### 293 **Postorbital**

294 The postorbital is subtriangular in outline and elongated anteroposteriorly, and it consists of part of the lateral skull roof.

295 Most parts of the postorbital are behind the orbit, but the anterodorsal process extends to the dorsal edge of the orbit (Figure  
296 2C–F). Thus, the postorbital consists of the posterior-upper and posterior rims of the orbits, which is similar to  
297 *Nanhsiungchelys wuchingensis*, *Jiangxichelys ganzhouensis* and *Zangerlia ukhaachelys* (Joyce & Norell, 2005; Tong et al.,  
298 2016; Tong & Li, 2019). The postorbital contacts the prefrontal and frontal anteriorly, the jugal and quadratojugal ventrally,  
299 and the parietal medially (Figure 2A–F). In dorsal view, the shape of the posterior margin of the postorbital is uncertain due to  
300 its poor preservation and because it is partly obscured by the carapace. Besides, it is uncertain if the postorbital consists of the  
301 rim of temporal emargination. Notably, the postorbital in both *Nanhsiungchelys yangi* and *Nanhsiungchelys wuchingensis* are  
302 relatively large in size (Tong & Li, 2019), whereas just a small element forms the ‘postorbital bar’ in *Jiangxichelys*  
303 *ganzhouensis* and *Zangerlia ukhaachelys* (Joyce & Norell, 2005; Tong et al., 2016).

#### 304 **Parietal**

305 The trapezoidal parietal contributes to the posterior part of the skull roof (Figure 2A, B), which is similar to  
306 *Nanhsiungchelys wuchingensis* (Tong & Li, 2019). However, the paired parietals are bigger than the fused frontal in dorsal  
307 view, contrasting with *Nanhsiungchelys wuchingensis* (Tong & Li, 2019). The parietal contacts the frontal anteriorly and  
308 contacts the postorbital laterally, and these boundaries are not straight. Posteriorly, the parietal constitutes the upper temporal  
309 emarginations, but the absence of the posterior ends (especially the right part) of the parietal limits the identification of the rim  
310 of upper temporal emarginations.

#### 311 **Mandible**

312 The mandible is preserved in situ and tightly closed with the skull (Figure 2C–F). The location of the mandible is posterior  
313 and interior to the maxillae (Figure 3). Therefore, the beak is hidden, but the lower parts of the mandible can be observed. The  
314 symphysis is fused, which is similar to *Nanhsiungchelys wuchingensis* (Tong & Li, 2019). In ventral view, the most anterior  
315 part of the mandible appears slender, but the middle and posterior parts are robust (Figure 3), which differs from  
316 *Nanhsiungchelys wuchingensis* in which nearly all parts of the mandible are equal in width (Tong & Li, 2019).

#### 317 **Carapace**

318 Only the anterior parts of the carapace are preserved (Figure 2A, B). The preserved parts indicate there is a deep nuchal  
319 emargination and a pair of anterolateral processes, which are similar to those of *Anomalochelys angulata*, *Nanhsiungchelys*  
320 *wuchingensis* and *Nanhsiungchelys* sp. (SNHM 1558) (Hirayama et al., 2001; Hirayama et al., 2009; Tong & Li, 2019). In  
321 contrast, the carapaces of other species of nanhsiungchelyids (including *Basilemys*, *Hanbogdemys*, *Kharakhutulia*,  
322 *Jiangxichelys*, *Zangerlia*) usually have a shallow nuchal emargination and/or lack the distinctive anterolateral processes  
323 (Mlynarski, 1972; Sukhanov, 2000; Sukhanov et al., 2008; Tong & Mo, 2010; Danilov et al., 2013; Mallon & Brinkman, 2018).  
324 In dorsal view, each anterolateral process of *Nanhsiungchelys yangi* is very wide (nearly 90°), similar to *Nanhsiungchelys*  
325 *wuchingensis*; however, the anterolateral processes of *Anomalochelys angulata* and *Nanhsiungchelys* sp. (SNHM 1558) are  
326 crescent-shaped and horn-shaped respectively, both of which are sharper than *Nanhsiungchelys yangi* (Hirayama et al., 2001;  
327 Hirayama et al., 2009). Among the above species of *Nanhsiungchelys* and *Anomalochelys*, there are always a distinct  
328 protrusion at the tip of each anterolateral process, and this protrusion becomes more prominent on *Anomalochelys angulata*  
329 and *Nanhsiungchelys* sp. (SNHM 1558) (Hirayama et al., 2001; Hirayama et al., 2009). Besides, in *Nanhsiungchelys*  
330 *wuchingensis* and *Anomalochelys angulata*, the most anterior end of the process shows varying degrees of bifurcation  
331 (Hirayama et al., 2001; Tong & Li, 2019), but this bifurcation does not occur in *Nanhsiungchelys yangi* and *Nanhsiungchelys*  
332 sp. (SNHM 1558) (Hirayama et al., 2009). Due to the lack of sutures preserved on the surface of the carapace, it is difficult to  
333 determine whether these processes are composed of nuchal or peripheral plates. However, considering the similarity in shape  
334 of the anterolateral processes in *Nanhsiungchelys yangi* and *Nanhsiungchelys wuchingensis*, the anterolateral processes of  
335 *Nanhsiungchelys yangi* may be formed by the first peripheral plates (the same condition in *Nanhsiungchelys wuchingensis*).

### 336 **Plastron**

337 A large plate under the mandible is identified as the anterior part of plastron (Figure 3). Despite there being little damage,  
338 the anterior edge of the epiplastron extends forward beyond the deepest part of nuchal emargination (Figure 3), similar to  
339 *Basilemys*, *Hanbogdemys*, *Jiangxichelys*, *Nanhsiungchelys*, and *Zangerlia* (Sukhanov, 2000; Danilov et al., 2013; Brinkman et  
340 al., 2015; Tong et al., 2016; Mallon & Brinkman, 2018; Tong & Li, 2019). The anterior part of the epiplastron is very thin, but

341 the plates become thickened posteriorly and laterally (Figure 1). Although preserved poorly, the angle between the left and  
342 right edges is about 55°, which is wider than *Hanbogdemys orientalis* (Sukhanov, 2000). The epiplastra are paired and  
343 connected at the midline. Because only the anterior part of the entoplastron is preserved, it is hard to recognize its shape. The  
344 anterior edges of the entoplastron are very convex, and lead into the posterior part of the epiplastra. The angle between the two  
345 anterior edges (>110°) is larger than in *Nanhsiungchelys wuchingensis* (~100°) (Tong & Li, 2019). The identifiable scutes are  
346 only gular and humeral. In many nanhsiungchelyids, like *Basilemys praeclara*, *Basilemys morrinensis*, *Jiangxichelys*  
347 *ganzhouensis*, *Jiangxichelys neimongolensis*, *Hanbogdemys orientalis*, *Zangerlia dzamynchondi*, *Kharakhutulia kalandadzei*  
348 (Brinkman & Nicholls, 1993; Brinkman & Peng, 1996; Sukhanov, 2000; Sukhanov et al., 2008; Danilov et al., 2013; Tong et  
349 al., 2016; Mallon & Brinkman, 2018), there are usually intergular or extragular scutes beside the gular scutes, but this does not  
350 occur in *Nanhsiungchelys wuchingensis* (Tong & Li, 2019) and *Nanhsiungchelys yangi*. Moreover, the location and shape of  
351 the sulcus of *Nanhsiungchelys yangi* are similar to *Nanhsiungchelys wuchingensis* (Tong & Li, 2019). In *Nanhsiungchelys*  
352 *yangi*, the sulcus between the gular and humeral scutes can be identified and they are slightly curved and extend onto the  
353 entoplastron, which is similar to *Jiangxichelys neimongolensis* and *Nanhsiungchelys wuchingensis* (Brinkman & Peng, 1996;  
354 Brinkman et al., 2015; Tong & Li, 2019). However, in the other nanhsiungchelyids (e.g. *Kharakhutulia kalandadzei*, *Zangerlia*  
355 *dzamynchondi*, *Hanbogdemys orientalis*, *Yuchelys nanyangensis* and *Jiangxichelys ganzhouensis*), this sulcus is tangential to  
356 (or separated from) the entoplastron (Sukhanov, 2000; Sukhanov et al., 2008; Tong et al., 2012; Danilov et al., 2013; Tong et  
357 al., 2016).

358

## 359 **Discussion**

### 360 **Taxonomy**

361 Through comparison with a complete specimen (IVPP V3106) of *Nanhsiungchelys wuchingensis*, the large skull (length =  
362 13 cm) of CUGW VH108 is inferred to correspond to a ~55.5 cm carapace length. This large body size, coupled with the  
363 special network of sculptures on the surface of the skull and shell, clearly demonstrates that CUGW VH108 belongs to

364 Nanhsiungchelyidae (Li & Tong, 2017). Moreover, CUGW VH108 has laterally thickened epiplastron (Figure 1) and the  
365 anterior edge of the epiplastron extends forward of the deepest part of nuchal emargination (Figure 3), additional features that  
366 are diagnostic of Nanhsiungchelyidae (Li & Tong, 2017).

367 Within Nanhsiungchelyidae, CUGW VH108 differs from *Basilemys*, *Hanbogdemys*, *Kharakhutulia*, *Yuchelys*, and *Zangerlia*  
368 because all of these taxa have weak nuchal emargination and/or lack distinct anterolateral processes (Mlynarski, 1972;  
369 Sukhanov, 2000; Sukhanov et al., 2008; Tong et al., 2012; Danilov et al., 2013; Mallon & Brinkman, 2018). Moreover, CUGW  
370 VH108 differs from *Jiangxichelys ganzhouensis* and *Jiangxichelys neimongolensis* in which the cheek emargination and  
371 temporal emargination are deep (Brinkman & Peng, 1996; Tong et al., 2016). Although the carapace of both *Anomalochelys*  
372 and CUGW VH108 have deep nuchal emargination and a pair of anterolateral processes, the former's anterolateral processes  
373 are crescent-shaped and have a bifurcated anterior end (Hirayama et al., 2001), which are significant differences from the  
374 processes of CUGW VH108.

375 CUGW VH108 can be assigned to the genus *Nanhsiungchelys* because of the deep nuchal emargination, pair of anterolateral  
376 processes, and the weakly developed cheek emargination and temporal emargination (Li & Tong, 2017). However, CUGW  
377 VH108 differs from *Nanhsiungchelys wuchingensis* in which the snout is trumpet shaped (Tong & Li, 2019). Moreover,  
378 *Nanhsiungchelys wuchingensis* and CUGW VH108 have some different skeletal features on the skull, the two most important  
379 of which are that CUGW VH108's premaxilla is very small and higher than wider (Figure 2C–F) and that a small portion of the  
380 maxilla extends behind and below the orbit (Figure 2C–F). CUGW VH108 also differs from *Nanhsiungchelys* sp. (SNHM  
381 1558) in which the anterolateral processes are horn-shaped (Hirayama et al., 2009). Thus, CUGW VH108 differs from all other  
382 known species of Nanhsiungchelyidae, and herein we erect a new species *Nanhsiungchelys yangi*. *Nanhsiungchelys yangi* is a  
383 medium-sized species of *Nanhsiungchelys*, with an estimated carapace length of more than 0.5 meters. The surface of the skull,  
384 carapace, and plastron are covered in a special network of sculptures consisting of pits and ridges. The triangular-shaped snout  
385 is large and long. Both the cheek emargination and temporal emargination are weakly developed. The carapace has a deep  
386 nuchal emargination and a pair of wide anterolateral processes.

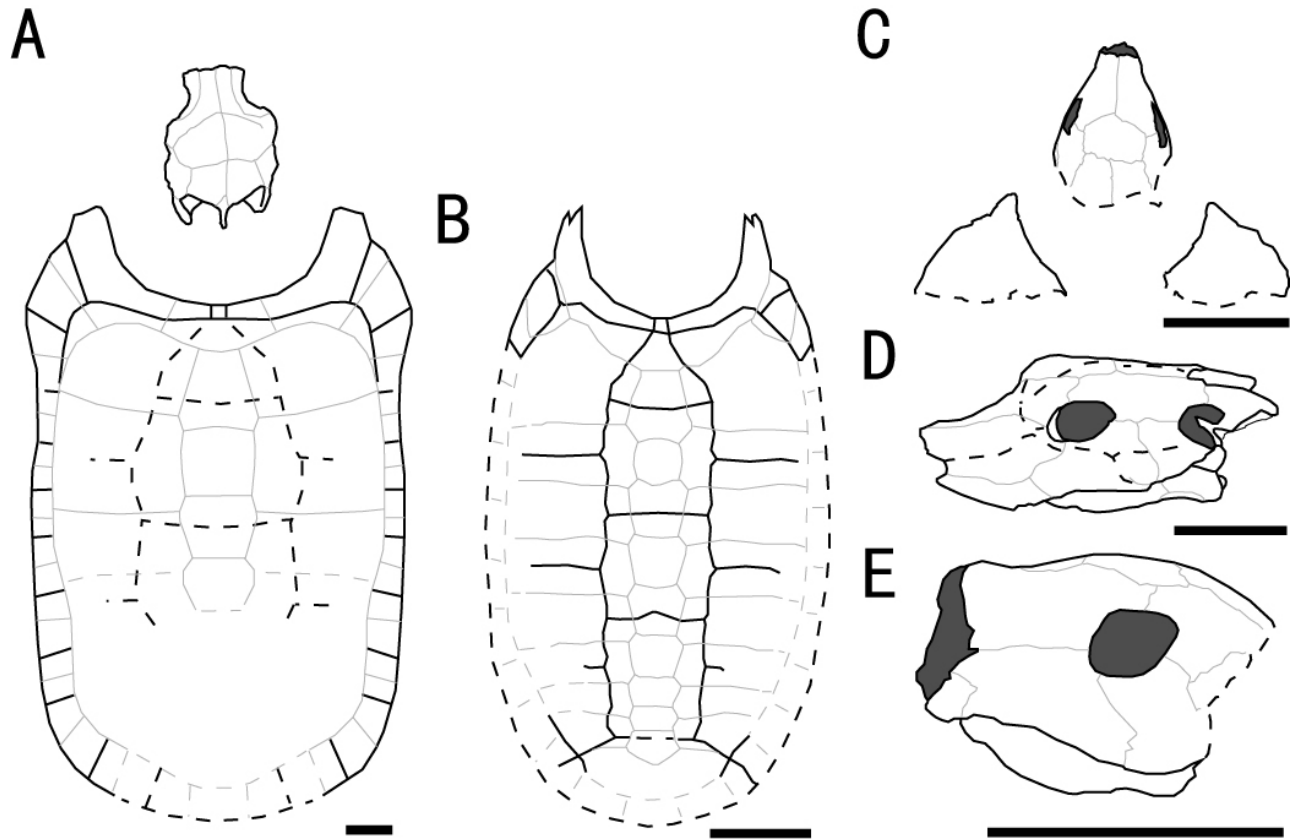

387

388 Figure 7. Outline drawings of three nanhsiungchelyids. A. Skull and carapace of *Nanhsiungchelys wuchingensis*, after  
389 Hirayama et al. (2001) and Tong & Li (2019). B. Carapace of *Anomalocheilus angulata*, after Hirayama et al. (2001). C. Skull  
390 and partial carapace of *Nanhsiungchelys yangi* (CUGW VH108). D. Skull of *Nanhsiungchelys wuchingensis* in left lateral view,  
391 after Tong & Li (2019). E. Skull of *Nanhsiungchelys yangi* (CUGW VH108) in left lateral view. Scale bars equal 10 cm. Bold  
392 black lines represent the sulci between scutes, thin gray lines indicate the sutures between bones, and dashed lines indicate a  
393 reconstruction of poorly preserved areas.

394

### 395 **Phylogenetic position and paleobiogeography**

396 The phylogenetic analysis retrieved seven most parsimonious trees with a length of 77 steps, with a consistency index (CI)  
397 of 0.675 and retention index (RI) of 0.679. The strict consensus tree (Figure 8) recovers *Nanhsiungchelys yangi* and  
398 *Nanhsiungchelys wuchingensis* as sister taxa, and one unambiguous synapomorphy was identified: the absence of the  
399 extragulars. These two species and *Anomalocheilus angulata* form a monophyletic group, which is consistent with the results of



400 Tong & Li (2019). Synapomorphies of this group include that the neurals are wide, the anterior side of the first vertebral is  
 401 constricted and primarily in contact with the cervical only, and the ratio of length to width of the carapace is larger than 1.6. In  
 402 particular, our new character (character 50, the ratio of length to width of the carapace) also effectively proves their  
 403 relationship, which further suggests the ratio of carapace needs more attention in turtles' phylogeny. However, the standard  
 404 bootstrap and Bremer supports values are low among these groups, and their relationships therefore need further consideration.  
 405 Interestingly, our new results identify *Yuchelys nanyangensis* and *Zangerlia testudinimorpha* as sister taxa, and this  
 406 relationship was supported by one unambiguous synapomorphy (their fifth vertebral almost fully covers the suprapygal).

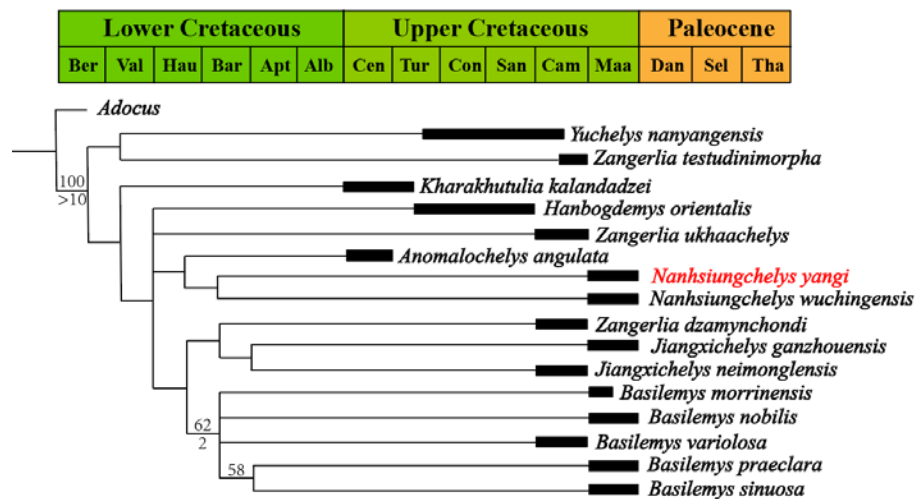

407  
 408 Figure 8. Strict consensus tree of Nanhsiungchelyidae. Numbers above nodes are bootstrap support value, and numbers below  
 409 nodes are Bremer support values. Temporal distributions of the above species are based on Yu et al. (1990), Danilov et al.  
 410 (2013), Wang et al. (2013), Zhang et al. (2013), and Mallon & Brinkman (2018). Abbreviations: Ber, Berriasian; Val,  
 411 Valanginian; Hau, Hauterivian; Bar, Barremian; Apt, Aptian; Alb, Albian; Cen, Cenomanian; Tur, Turonian; Con, Coniacian;  
 412 San, Santonian; Cam, Campanian; Maa, Maastrichtian; Dan, Danian; Sel, Selandian; Tha, Thanetian.

413  
 414 Our results support a close relationship between the genera *Nanhsiungchelys* and *Anomalochelys*, even though they lived in  
 415 different times and regions (Figure 8). However, based on the similarity of extinct plants and animals, Sun & Yang (2010)  
 416 inferred that the Japan Sea did not exist during the Jurassic and Cretaceous, with the Japan archipelago still closely linked to

417 the eastern continental margin of East Asia. This view is also supported by geological and geophysical evidence (Kaneoka et  
418 al., 1990; Liu et al., 2017). In addition to *Anomalocheilus angulata* from Hokkaido (Hirayama et al., 2001), many fragments of  
419 Nanhsiungchelyidae (as *Basilemys* sp.) have also been found on Honshu and Kyushu islands, Japan (Hirayama, 1998, 2002;  
420 Danilov & Syromyatnikova, 2008). In China, the easternmost specimen of nanhsiungchelyids (a fragment of the shell) was  
421 recovered from the Upper Cretaceous of Laiyang, Shandong (Li & Tong, 2017), which is near the west coast of the Pacific  
422 Ocean and close to Japan geographically. This geographical proximity likely allowed nanhsiungchelyids to migrate between  
423 China and Japan during the Late Cretaceous.

424 *Nanhsiungchelys* is the only group of turtles that has been found from the Upper Cretaceous of Nanxiong Basin, and it  
425 shows a high diversity, including *Nanhsiungchelys yangi*, *Nanhsiungchelys wuchingensis*, and *Nanhsiungchelys* sp (SNHM  
426 1558) (Hirayama et al., 2009; Tong & Li, 2019). Such high diversity in a restricted space is comparable to the condition on  
427 some other islands, for example, 14 species of *Chelonoidis* lived on nine islands of the Galapagos archipelago (Zhou & Zhou,  
428 2020). Perhaps the reason for this phenomenon is that *Nanhsiungchelys* was adapt to the extreme environment of Nanxiong  
429 Basin, such as the hot temperatures (26.66~33.95 °C) during the Late Cretaceous (Yang et al., 1993), with the constituent  
430 species occupying different ecological niches.

431

#### 432 **Function of the anterolateral processes of the carapace**

433 *Nanhsiungchelys* and *Anomalocheilus* have a pair of distinct anterolateral processes on the carapace, and we hypothesized  
434 that these processes would affect drag when the animal was swimming through water. The CFD simulations allow us to  
435 evaluate the drag produced by each of the turtle models. In simulations with flow velocities ranging from 0.6 m/s to 2.6 m/s,  
436 both the drag forces and the drag coefficients of the *Nanhsiungchelys yangi* model were always lower than the generalized  
437 turtle model (Table 3; Figure 9). Considering the only difference between these two 3-D models is whether there is a pair of  
438 anterolateral processes on carapace, this result strongly suggests that these processes played an important role in reducing  
439 resistance (~25 % reduction in drag). The reduction of drag could enhance locomotory performance by conserving the energy

440 expended during swimming (Fish, 2000; Gutarra et al., 2019; Song et al., 2021). This reinforces the importance of the  
441 anterolateral processes to the movement of *Nanhsiungchelys* in water.

442 In the simulations with an inlet flow velocity of 1.0 m/s, the 2-D plots of flow velocity magnitude show that there was a  
443 low-velocity zone near the proximal forelimbs in the generalized turtle model (Figure 10A), but this zone was not evident in  
444 the *Nanhsiungchelys yangi* model (Figure 10B). The same pattern was observed when the inlet flow velocity was increased to  
445 2.2 m/s (Figure 10C, D). The reason for this phenomenon may be that the anterolateral processes of *Nanhsiungchelys yangi* did  
446 not extend horizontally forward, but instead bend downwards. Therefore, these processes made the anterior part of the shell  
447 more streamlined (Figure 11A, B), analogous to the streamlined fairing on the anterior of airplanes and rockets. In the model  
448 without processes, the anterior edge of the shell is rather blunt, resulting in greater overall drag (Figure 11C, D).

449 Hirayama et al. (2001) assumed that the horns (processes) on *Anomalochelys*' carapace were used to protect the skull.  
450 However, due to the lack of obvious neural crest and transverse processes on the cervical vertebra, Yeh (1966) suggested that  
451 the neck of *Nanhsiungchelys wuchingensis* was flexible, and inferred that the skull could be withdrawn into the shell to avoid  
452 danger. *Jiangxichelys neimongolensis* was likely also able to withdraw the head into the shell, as indicated by a complete  
453 specimen (93NMBY-2) from Inner Mongolia, China (Brinkman et al., 2015). Thus, if nanhsiungchelyids were able to protect  
454 the skull and neck by withdrawing them into the shell, the anterolateral processes may have had a different function. The  
455 anterolateral processes are unlikely to have been used for mate competition. In extant tortoises (e.g. *Testudo horsfieldi*), males  
456 compete for mates by hitting each other with the anterior edges of their plastron (Shi, 1998), and this is why male tortoises  
457 usually have more robust anterior edges of plastron. However, it is unknown whether nanhsiungchelyids similarly fought for  
458 the right to mate, and the prominent processes on *Nanhsiungchelys* and *Anomalochelys* are on their carapace rather than the  
459 plastron. Thus, a role in enhancing locomotion through drag reduction is the most likely explanation for the presence of the  
460 anterolateral processes on the carapace.

461 The swimming ability of *Nanhsiungchelys* is not incompatible with some skeletal characteristics of terrestrial turtles (Yeh,  
462 1966). This is parallel with some extant tortoises (e.g. *Aldabrachelys gigantea*), which has a domed carapace and elephantine

463 limbs, like burying the body in the mud of shallow water to avoid the hot weather (Zhou & Zhou, 2020), and they could even  
 464 swim (or float) in the ocean (Gerlach et al., 2006; Hansen et al., 2016). Perhaps the drag-reducing function of the anterolateral  
 465 processes of *Nanhsiungchelys* helps them survive in a harsh environment and even migrate over a long distance.  
 466  
 467 Table 3. Drag forces and drag coefficients for three-dimensional digital models of *Nanhsiungchelys yangi* and a generalized  
 468 turtle at different flow velocities.

| Flow velocity<br>(m/s) | <i>Nanhsiungchelys yangi</i> |                  | Generalized turtle |                  | Drag reduction due to<br>anterolateral processes |
|------------------------|------------------------------|------------------|--------------------|------------------|--------------------------------------------------|
|                        | Drag force (N)               | Drag coefficient | Drag force (N)     | Drag coefficient |                                                  |
| 0.6                    | 7.132                        | 0.330            | 9.473              | 0.439            | 24.71 %                                          |
| 1.0                    | 19.176                       | 0.320            | 25.826             | 0.430            | 25.75 %                                          |
| 1.4                    | 37.064                       | 0.315            | 50.204             | 0.427            | 26.17 %                                          |
| 1.8                    | 60.734                       | 0.312            | 82.586             | 0.425            | 26.46 %                                          |
| 2.2                    | 90.204                       | 0.311            | 122.988            | 0.424            | 26.66 %                                          |
| 2.6                    | 125.444                      | 0.309            | 171.410            | 0.423            | 26.82 %                                          |

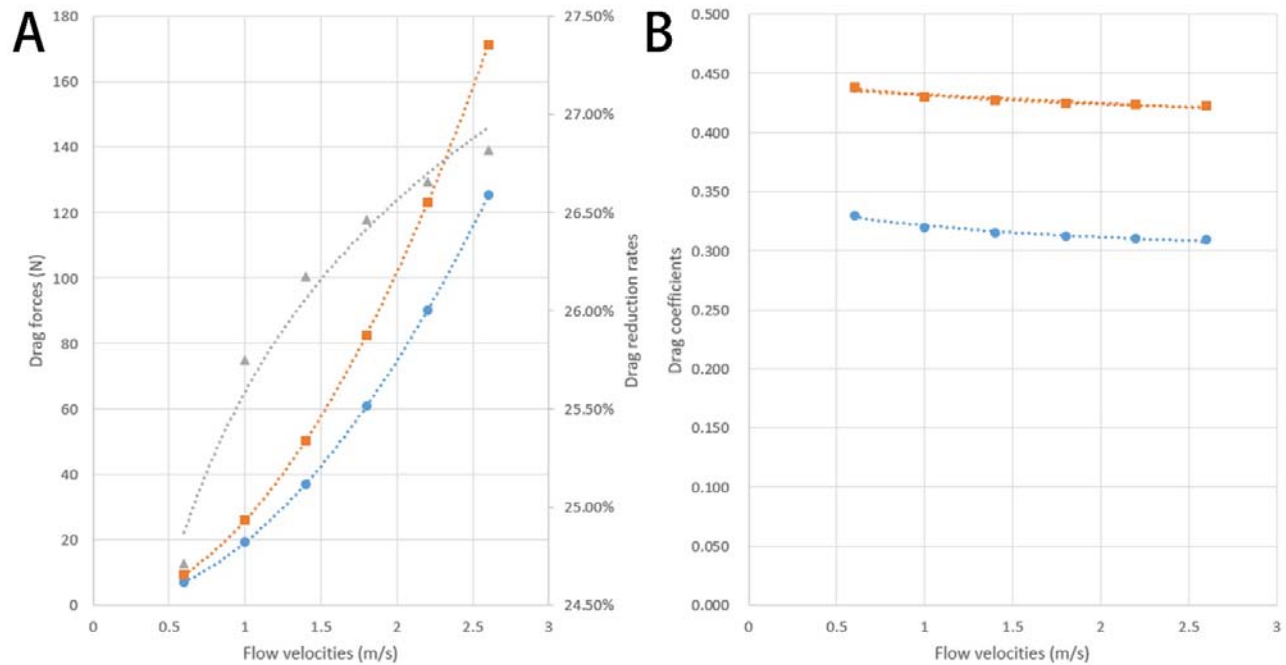

469  
 470 Figure 9. Comparison of drag forces (A) and drag coefficients (B) for three-dimensional digital models of *Nanhsiungchelys*  
 471 *yangi* and a generalized turtle at different flow velocities. Blue circles represent results for the *Nanhsiungchelys yangi* model,  
 472 orange squares represent results for the generalized turtle model, and grey triangles represent the drag reduction brought about  
 473 by the anterolateral processes.

474

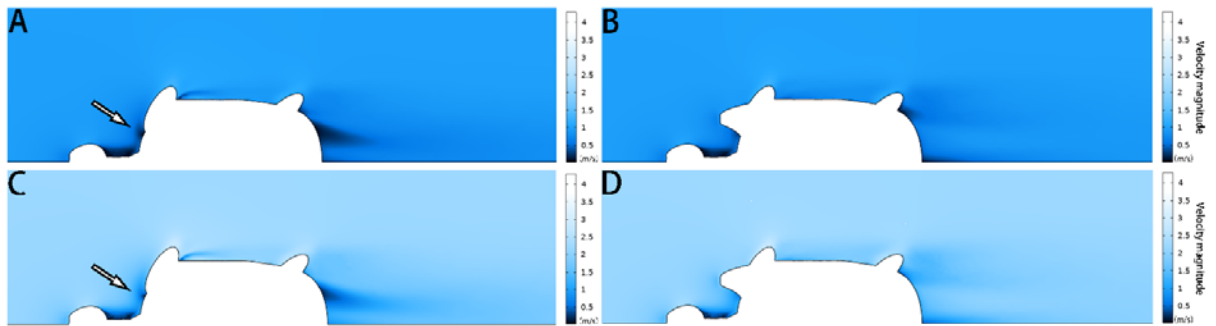

475

476 Figure 10. 2-D plots of flow velocity magnitude. A shows results for the generalized turtle model at a flow velocity of 1.0 m/s.

477 B shows results for the *Nanshiungchelys yangi* model at a flow velocity of 1.0 m/s. C shows results for the generalized turtle

478 model at a flow velocity of 2.2 m/s. D shows results for the *Nanshiungchelys yangi* model at a flow velocity of 2.2 m/s. The

479 arrows indicate the low-velocity zones near the proximal forelimbs.

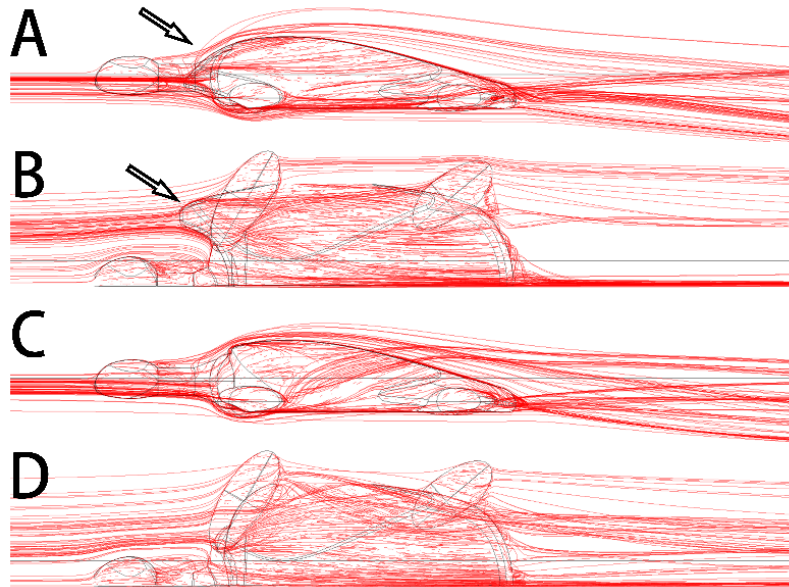

480

481 Figure 11. 3-D plots of streamline at flow velocities of 1.0 m/s. A. *Nanshiungchelys yangi* model in left lateral view. B.

482 *Nanshiungchelys yangi* model in dorsal view. C. Generalized turtle model in left lateral view. D. Generalized turtle model in

483 dorsal view. The arrows indicate the anterolateral processes.

484

## 485 Conclusions

486 A turtle skeleton (CUGW VH108) with a well-preserved skull and lower jaw, together with the anterior parts of the shell,

487 was found in Nanxiong Basin, China. This is assigned to the genus *Nanhsiungchelys* based on the huge estimated body size  
488 (~55.5 cm), a special network of sculptures on the surface of the skull and shell, weak cheek emargination and temporal  
489 emargination, deep nuchal emargination, and a pair of anterolateral processes on the carapace. Based on the character  
490 combination of a triangular-shaped snout and wide anterolateral processes, we erect a new species *Nanhsiungchelys yangi*. A  
491 phylogenetic analysis of nanhsiungchelyids places *Nanhsiungchelys yangi* and *Nanhsiungchelys wuchingensis* as sister taxa.  
492 *Nanhsiungchelys* shows a high diversity (three species) in Nanxiong Basin, which may be because these turtles could adapt to  
493 extremely hot environments during the Late Cretaceous. Finally, based on the results of CFD, we infer that the anterolateral  
494 processes on the carapace in *Nanhsiungchelys yangi* could enhance locomotory performance by reducing drag when the animal  
495 was swimming through water.

496

#### 497 **Acknowledgements**

498 We thank Xing Xu (IVPP) for his useful suggestions, thank Kaifeng Wu (YSNHM) for preparing turtle skeleton, and thank  
499 Mingbo Wang (UPC), Zichuan Qin (UB), Wen Deng (CUGW) and Haoran Sun (LJU) for assistance with CFD. This work was  
500 supported by the National Natural Science Foundation of China (42288201).

501

#### 502 **Appendix 1. Taxon-character matrix (nex.)**

503

#### 504 **Appendix 2. Three-dimensional digital models of *Nanhsiungchelys yangi* and generalized turtle (stl.)**

505

#### 506 **Appendix 3. Reconstruction steps of three-dimensional digital models**

507

#### 508 **References**

509 Adkins, D., & Yan, Y. (2006). CFD Simulation of Fish-like Body Moving in Viscous Liquid. *Journal of Bionic Engineering*,

- 510 3(3), 147-153. doi: 10.1016/S1672-6529(06)60018-8
- 511 Bremer, K. (1994). Branch support and tree stability. *Cladistics*, 10(3), 295-304. doi: /10.1111/j.1096-0031.1994.tb00179.x
- 512 Brinkman, D., & Nicholls, E. L. (1993). New specimen of *Basilemys praeclara* Hay and its bearing on the relationships of the
- 513 Nanhsiungchelyidae (Reptilia: Testudines). *Journal of Paleontology*, 67(6), 1027-1031.
- 514 doi:10.1017/S002233600002535X
- 515 Brinkman, D., & Peng, J.-H. (1996). A new species of *Zangerlia* (Testudines: Nanhsiungchelyidae) from the Upper Cretaceous
- 516 redbeds at Bayan Mandahu, Inner Mongolia, and the relationships of the genus. *Canadian Journal of Earth Sciences*,
- 517 33(4), 526-540. doi:10.1139/e96-041
- 518 Brinkman, D. B., Tong, H.-Y., Li, H., Sun, Y., Zhang, J.-S., Godefroit, P., & Zhang, Z.-M. (2015). New exceptionally
- 519 well-preserved specimens of “*Zangerlia*” *neimongolensis* from Bayan Mandahu, Inner Mongolia, and their taxonomic
- 520 significance. *Comptes Rendus Palevol*, 14(6-7), 577-587. doi:10.1016/j.crpv.2014.12.005
- 521 Cadena, E.-A., Scheyer, T. M., Carrillo-Briceño, J. D., Sánchez, R., Aguilera-Socorro, O. A., Vanegas, A., Pardo, M., Hansen,
- 522 D. M., Sánchez-Villagra, M. R. (2020). The anatomy, paleobiology, and evolutionary relationships of the largest
- 523 extinct side-necked turtle. *Science advances*, 6(7), eaay4593. doi: 10.1126/sciadv.aay4593
- 524 Chang, Y.-P., & Tung, Y.-S. (1963). Subdivision of "redbeds" of Nanhsiung Basin, Kwangtung. *Vertebrata Palasiatica*, 7(3),
- 525 249-260. (in Chinese with English abstract)
- 526 Danilov, I. G., Sukhanov, V. B., & Syromyatnikova, E. V. (2013). Redescription of *Zangerlia dzamynchondi* (Testudines:
- 527 Nanhsiungchelyidae) from the Late Cretaceous of Mongolia, with a reassessment of the phylogenetic position and
- 528 relationships of *Zangerlia*. In *Morphology and Evolution of Turtles* (pp. 407-417). doi:
- 529 10.1007/978-94-007-4309-0\_22
- 530 Danilov, I. G., & Syromyatnikova, E. V. (2008). New materials on turtles of the family Nanhsiungchelyidae from the
- 531 Cretaceous of Uzbekistan and Mongolia, with a review of the nanhsiungchelyid record in Asia. *Proceedings of the*
- 532 *Zoological Institute RAS*, 312(1/2), 3-25.

- 533 Dudgeon, T. W., Livius, M. C. H., Alfonso, N., Tessier, S., & Mallon, J. C. (2021). A new model of forelimb ecomorphology  
534 for predicting the ancient habitats of fossil turtles. *Ecology and Evolution*, *11*(23), 17071-17079.  
535 doi:10.1002/ece3.8345
- 536 Dynowski, J. F., Nebelsick, J. H., Klein, A., & Roth-Nebelsick, A. (2016). Computational fluid dynamics analysis of the fossil  
537 crinoid *Encrinurus liliiformis* (Echinodermata: Crinoidea). *PLoS One*, *11*(5), e0156408.  
538 doi:10.1371/journal.pone.0156408
- 539 Eckert, S. A. (2002). Swim speed and movement patterns of gravid leatherback sea turtles (*Dermochelys coriacea*) at St Croix,  
540 US Virgin Islands. *The Journal of Experimental Biology*, *205*, 3689–3697. doi:10.1242/jeb.205.23.3689
- 541 Fish, F. E. (2000). Biomechanics and energetics in aquatic and semiaquatic mammals: platypus to whale. *Physiological and*  
542 *Biochemical Zoology*, *73*(6), 683-698. doi:10.1086/318108
- 543 Gerlach, J., Muir, C., & Richmond, M. D. (2006). The first substantiated case of trans-oceanic tortoise dispersal. *Journal of*  
544 *Natural History*, *40*(41-43), 2403-2408. doi:10.1080/00222930601058290
- 545 Gibson, B. M., Furbish, D. J., Rahman, I. A., Schmeckle, M. W., Laflamme, M., & Darroch, S. A. F. (2021). Ancient life and  
546 moving fluids. *Biological Reviews*, *96*(1), 129-152. doi:10.1111/brv.12649
- 547 Goloboff, P. A., & Catalano, S. A. (2016). TNT version 1.5, including a full implementation of phylogenetic morphometrics.  
548 *Cladistics*, *32*(3), 221-238. doi: /10.1111/cla.12160
- 549 Guo, Y., Wang, J., Zhang, F., Lei, L., Zhao, Y., Wang, Y., & Wang, X. (2019). A review of computational fluid dynamics and its  
550 application in quantitative analysis of the morphological function of palaeontology. *Journal of Biology*, *36*(5), 92-95.  
551 doi:10.3969/j.issn.2095-1736.2019.05.092 (in Chinese with English abstract)
- 552 Gutarra, S., Moon, B. C., Rahman, I. A., Palmer, C., Lautenschlager, S., Brimacombe, A. J., & Benton, M. J. (2019). Effects of  
553 body plan evolution on the hydrodynamic drag and energy requirements of swimming in ichthyosaurs. *Proceedings of*  
554 *the Royal Society B: Biological Sciences*, *286*(1898), 20182786. doi:10.1098/rspb.2018.2786
- 555 Hansen, D. M., Austin, J. J., Baxter, R. H., Boer, E. J. d., Falcón, W., Norder, S. J., Rijdsdijk, K. F., Thébaud, C., Bunbury, N. J.,



- 556 Warren, B. H. (2016). Origins of endemic island tortoises in the western Indian Ocean: a critique of the  
557 human-translocation hypothesis. *Journal of Biogeography*, 44(6), 1430-1435. doi: /10.1111/jbi.12893
- 558 Hirayama, R. (1998). Fossil turtles from the Mifune Group (Late Cretaceous) of Kumamoto Prefecture, Western Japan. Report  
559 of the research on the distribution of important fossils in Kumamoto Prefecture. Dinosaurs from the Mifune Group,  
560 Kumamoto Prefecture, Japan. Mifune Town Education Board. 1998: 85-99. (in Japanese with English abstract)
- 561 Hirayama, R. (2002). Preliminary report of the fossil turtles from the Kitadani Formation (Early Cretaceous) of the Tetori  
562 Group of Katsuyama, Fukui Prefecture, Central Japan. *Memoir of the Fukui Prefectural Dinosaur Museum*, 1, 29-40.  
563 (in Japanese with English abstract)
- 564 Hirayama, R., Brinkman, D. B., & Danilov, I. G. (2000). Distribution and biogeography of non-marine Cretaceous turtles.  
565 *Russian Journal of Herpetology*, 7(3), 181-198.
- 566 Hirayama, R., Sakurai, K., Chitoku, T., Kawakami, G., & Kito, N. (2001). *Anomalocheilus angulata*, an unusual land turtle of  
567 family Nanhsiungchelyidae (superfamily Trionychoidea; order Testudines) from the Upper Cretaceous of Hokkaido,  
568 North Japan. *Russian Journal of Herpetology*, 8(2), 127-138.
- 569 Hirayama, R., Zhong, Y., Di, Y., Yonezawa, T., & Hasegawa, M. (2009). A new nanhsiungchelyid turtle from Late Cretaceous  
570 of Guangdong, China. In D. Brinkman (Ed.), *Gaffney Turtle Symposium* (pp. 72-73): Drumheller: Royal Tyrell  
571 Museum.
- 572 Hutchison, J. H., & Archibald, J. D. (1986). Diversity of turtles across the Cretaceous/Tertiary boundary in northeastern  
573 Montana. *Palaeogeography, Palaeoclimatology, Palaeoecology*, 55, 1-22. doi: 10.1016/0031-0182(86)90133-1
- 574 Joyce, W. G., Anquetin, J., Cadena, E.-A., Claude, J., Danilov, I. G., Evers, S. W., Ferreira, G. S., Gentry, A. D., Georgalis, G.  
575 L., Lyson, T. R., Pérez-García, A., Rabi, M., Sterli, J., Vitek, N. S., Parham, J. F. (2021). A nomenclature for fossil and  
576 living turtles using phylogenetically defined clade names. *Swiss Journal of Palaeontology*, 140(5), 1-45.  
577 doi:10.1186/s13358-020-00211-x
- 578 Joyce, W. G., & Norell, M. A. (2005). *Zangerlia ukhaachelys*, new species, a nanhsiungchelyid turtle from the Late Cretaceous

- 579 of Ukhaa Tolgod, Mongolia. *American Museum Novitates*, 3481, 1-20.
- 580 doi:10.1206/0003-0082(2005)481[0001:Zunsan]2.0.Co;2
- 581 Kaneoka, I., Notsu, K., Takigami, Y., Fujioka, K., & Sakai, H. (1990). Constraints on the evolution of the Japan Sea based on
- 582  $^{40}\text{Ar}$ - $^{39}\text{Ar}$  ages and Sr isotopic ratios for volcanic rocks of the Yamato Seamount chain in the Japan Sea. *Earth and*
- 583 *Planetary Science Letters*, 97, 211-225. doi: 10.1016/0012-821x(90)90109-b
- 584 Ke, Y., Wu, R., Zelenitsky, D. K., Brinkman, D., Hu, J., Zhang, S., Jiang, H., Han, F. (2021). A large and unusually
- 585 thick-shelled turtle egg with embryonic remains from the Upper Cretaceous of China. *Proceedings of the Royal*
- 586 *Society B: Biological Sciences*, 288(1957), 20211239. doi:10.1098/rspb.2021.1239
- 587 Kogan, I., Pacholak, S., Licht, M., Schneider, J. W., Brücker, C., & Brandt, S. (2015). The invisible fish: hydrodynamic
- 588 constraints for predator-prey interaction in fossil fish *Saurichthys* compared to recent actinopterygians. *Biology Open*,
- 589 4(12), 1715-1726. doi:10.1242/bio.014720
- 590 Li, J., & Tong, H. (2017). *Palaeovertebrata sinica, volume II, amphibians, reptilians, and avians, fascicle 2 (serial no. 6),*
- 591 *parareptilians, captorhines, and testudines*. Beijing: Science Press. (in Chinese)
- 592 Ling, Q., Zhang, X., & Lin, J. (2005). New advance in the study of the Cretaceous and Paleogene strata of the Nanxiong Basin.
- 593 *Journal of Stratigraphy*, 29, 596-601. (in Chinese with English abstract)
- 594 Liu, M., Wei, D., & Shi, Y. (2017). Review on the opening and evolution models of the Japan sea. *Progress in Geophysics*,
- 595 32(6), 2341-2352. (in Chinese with English abstract)
- 596 Liu, S., Smith, A. S., Gu, Y., Tan, J., Liu, C. K., & Turk, G. (2015). Computer simulations imply forelimb-dominated
- 597 underwater flight in Plesiosaurs. *PLoS Computational Biology*, 11(12), e1004605. doi:10.1371/journal.pcbi.1004605
- 598 Mallon, J. C., & Brinkman, D. B. (2018). *Basilemys morrinensis*, a new species of nanhsiungchelyid turtle from the Horseshoe
- 599 Canyon Formation (Upper Cretaceous) of Alberta, Canada. *Journal of Vertebrate Paleontology*, 38(2), e1431922.
- 300 doi:10.1080/02724634.2018.1431922
- 301 Mlynarski, M. (1972). *Zangerlia testudinimorpha* n. gen., n. sp., a primitive land tortoise from the Upper Cretaceous of

- 302 Mongolia. *Palaeontologia Polonica*, 27, 85-92.
- 303 Nesso, L. A. (1981). On the phylogenetic relationships of some families of terrestrial turtles. *Trudy Vsesoyuznogo*  
304 *Palaeontologicheskogo Obshchestva*, 1981, 133-141. (in Russian)
- 305 Rahman, I. A. (2017). Computational fluid dynamics as a tool for testing functional and ecological hypotheses in fossil taxa.  
306 *Palaeontology*, 60(4), 451-459. doi:10.1111/pala.12295
- 307 Rahman, I. A., O'Shea, J., Lautenschlager, S., & Zamora, S. (2020). Potential evolutionary trade-off between feeding and  
308 stability in Cambrian cinctan echinoderms. *Palaeontology*, 63, 689-701. doi: /10.1111/pala.12495
- 309 Reynolds, O. (1883). An experimental investigation of the circumstances which determine whether the motion of water shall  
310 be direct or sinuous, and of the law of resistance in parallel channels. *Philosophical Transactions of the Royal Society*  
311 *of London*, 174, 935-982. doi: /10.1098/rstl.1883.0029
- 312 Scheyer, T. M. (2007). *Comparative bone histology of the turtle shell (carapace and plastron): implications for turtle*  
313 *systematics, functional morphology and turtle origins*. (PhD), University of Bonn, Bonn.
- 314 Shi, H. (1998). Ecological research and conservation status of *Testudo horsfieldi*. *Sichuan Journal of Zoology*, 17(2), 65-69. (in  
315 Chinese)
- 316 Shiino, Y., & Kuwazuru, O. (2010). Functional adaptation of spiriferide brachiopod morphology. *Journal of Evolutionary*  
317 *Biology*, 23(7), 1547-1557. doi:10.1111/j.1420-9101.2010.02024.x
- 318 Shiino, Y., Kuwazuru, O., Suzuki, Y., & Ono, S. (2012). Swimming capability of the remopleuridid trilobite *Hypodicranotus*  
319 *striatus*: hydrodynamic functions of the exoskeleton and the long, forked hypostome. *Journal of Theoretical Biology*,  
320 300, 29-38. doi:10.1016/j.jtbi.2012.01.012
- 321 Shiino, Y., Kuwazuru, O., & Yoshikawa, N. (2009). Computational fluid dynamics simulations on a Devonian spiriferid  
322 *Paraspirifer bownockeri* (Brachiopoda): generating mechanism of passive feeding flows. *Journal of Theoretical*  
323 *Biology*, 259(1), 132-141. doi:10.1016/j.jtbi.2009.02.018
- 324 Song, H., Song, H., Rahman, I. A., & Chu, D. (2021). Computational fluid dynamics confirms drag reduction associated with

- 325 trilobite queuing behaviour. *Palaeontology*, 64(5), 597-608. doi:10.1111/pala.12562
- 326 Sukhanov, V. B. (2000). Mesozoic turtles of Middle and Central Asia. In M. J. Benton, M. A. Shishkin, D. M. Unwin, & E. N.  
327 Kurochkin (Eds.), *The age of dinosaurs in Russia and Mongolia* (pp. 309-367). Cambridge: Cambridge University  
328 Press.
- 329 Sukhanov, V. B., Danilov, I. G., & Syromyatnikova, E. V. (2008). The description and phylogenetic position of a new  
330 nanhsiungchelyid turtle from the Late Cretaceous of Mongolia. *Acta Palaeontologica Polonica*, 53(4), 601-614.  
331 doi:10.4202/app.2008.0405
- 332 Sukhanov, V. B., & Narmandakh, P. (1977). The shell and limbs of *Basilemys orientalis* (Chelonia, Dermatemyidae): a  
333 contribution to the morphology and evolution of the genus. *Fauna, flora i biostratografiya Mezozoya i Kainozoya*  
334 *Mongolii. Sovmestnaya Sovetsko-Mongol'skaya Nauchneissledovat El'skaya Geologicheskaya Ekspeditsiya, Trudy*, 4,  
335 57-79. (in Russian)
- 336 Sun, G., & Yang, T. (2010). Paleontological evidence-based discussion on the origin of the Japan Sea. *Marine Sciences*, 34(5),  
337 89-92. (in Chinese)
- 338 Tong, H., & Li, L. (2019). A revision of the holotype of *Nanhsiungchelys wuchingensis*, Ye, 1966 (Testudines: Cryptodira:  
339 Trionychoidea: Nanhsiungchelyidae). *Cretaceous Research*, 95, 151-163. doi:10.1016/j.cretres.2018.11.003
- 340 Tong, H., Li, L., Jie, C., & Yi, L. (2016). New material of *Jiangxichelys ganzhouensis* Tong & Mo, (Testudines: Cryptodira:  
341 Nanhsiungchelyidae) and its phylogenetic and palaeogeographical implications. *Geological Magazine*, 154(3),  
342 456-464. doi:10.1017/s0016756816000108
- 343 Tong, H., & Mo, J. (2010). *Jiangxichelys*, a new nanhsiungchelyid turtle from the Late Cretaceous of Ganzhou, Jiangxi  
344 Province, China. *Geological Magazine*, 147(6), 981-986. doi:10.1017/s0016756810000671
- 345 Tong, H., Xu, L., Buffetaut, E., Zhang, X., & Jia, S. (2012). A new nanhsiungchelyid turtle from the Late Cretaceous of  
346 Neixiang, Henan Province, China. *Annales de Paléontologie*, 98(4), 303-314. doi:10.1016/j.annpal.2012.08.001
- 347 Wang, D., Cao, X., Zhao, H., Cao, M., Fu, G., Yan, F., Qiang, W., Wang, Y. (2013). Discovery of invertebrate zoolite in the

- 348 Xiaguan Formation of Xiaguan-Gaoqiu Basin, Henan, China, and its importance for stratigraphic subdivision  
349 comparison. *Acta Geologica Sinica*, 87(8), 1049-1058. (in Chinese with English abstract)
- 350 Xiao, F, Kong, F., Wang, J., & Shi, H. (2017). A review on the ecomorphology of turtles. *Chinese Journal of Ecology*, 36(2),  
351 530-540. (in Chinese with English abstract)
- 352 Yang, W., Chen, N., Ni, S., Nan, J., Wu, M., Jiang, J., Ye, J., Feng, X., Ran, Y. (1993). Carbon and oxygen isotopic  
353 composition and environmental significance of Cretaceous red-bed carbonate rocks and dinosaur eggshells. *Chinese*  
354 *Science Bulletin*, 38(23), 2161-2163. (in Chinese)
- 355 Yeh, H. (1966). A new Cretaceous turtle of Nanhsiung, Northern Kwangtung. *Vertebrata Palasiatica*, 10(2), 191-200. (in  
356 Chinese with English abstract)
- 357 Young, C. (1965). Fossil eggs from Nanhsiung, Kwangtung and Kanchou, Kiangsi. *Vertebrata Palasiatica*, 9(2), 141-159. (in  
358 Chinese with English abstract)
- 359 Yu, W., Gu, H., & Zhang, X. (1990). Assemblage sequence of Late Cretaceous and Early Tertiary non-marine gastropods from  
360 Nanxiong Basin, Guangdong. *Acta Palaeontologica Sinica*, 29(2), 160-182. (in Chinese with English abstract)
- 361 Zhang, X., Zhang, X., Hou, M., Li, G., & Li, H. (2013). Lithostratigraphic subdivision of red beds in Nanxiong Basin,  
362 Guangdong, China. *Journal of Stratigraphy*, 37(4), 441-451. (in Chinese with English abstract)
- 363 Zhao, Z., Wang, Q., & Zhang, S. (2015). *Palaeovertebrata Sinica, Volume II, Amphibians, Reptilians, and Avians, Fascicle 7*  
364 *(Serial no.11), Dinosaur Eggs*. Beijing: Science Press. (in Chinese)
- 365 Zhao, Z., Ye, J., Li, H., Zhao, Z., & Yan, Z. (1991). Extinction of dinosaurs at Cretaceous-Tertiary boundary in Nanxiong Basin,  
366 Guangdong Province. *Vertebrata Palasiatica*, 29(1), 1-12. (in Chinese)
- 367 Zhou, T., & Zhou, F. (2020). *Tortoises of the World*. Beijing: China Agriculture Press. (in Chinese)
